1 **A cell-free antibody engineering platform rapidly generates SARS-CoV-2**  
2 **neutralizing antibodies**

3 Xun Chen<sup>1,#</sup>, Matteo Gentili<sup>2</sup>, Nir Hacohen<sup>2,3,4</sup>, Aviv Regev<sup>1,5,6,7,#</sup>

4

5 <sup>1</sup> Klarman Cell Observatory, Broad Institute of MIT and Harvard, Cambridge, MA, USA

6 <sup>2</sup> Broad Institute of MIT and Harvard, Cambridge, MA, USA

7 <sup>3</sup> Department of Medicine, Harvard Medical School, Boston, MA, USA

8 <sup>4</sup> Center for Cancer Research, Massachusetts General Hospital, Boston, MA, USA

9 <sup>5</sup> Massachusetts Institute of Technology, Department of Biology, Cambridge, MA, USA

10 <sup>6</sup> Howard Hughes Medical Institute, Chevy Chase, MD, USA

11 <sup>7</sup> Current address: Genentech, 1 DNA Way, South San Francisco, CA, USA

12 <sup>#</sup> To whom correspondence should be addressed: [xun@broadinstitute.org](mailto:xun@broadinstitute.org) (X.C.), [aregev@broadinstitute.org](mailto:aregev@broadinstitute.org) (A.R.)

13

14

15 **Abstract**

16 Antibody engineering technologies face increasing demands for speed, reliability and scale. We  
17 developed CeVICA, a cell-free antibody engineering platform that integrates a novel generation  
18 method and design for camelid heavy-chain antibody VHH domain-based synthetic libraries,  
19 optimized *in vitro* selection based on ribosome display and a computational pipeline for binder  
20 prediction based on CDR-directed clustering. We applied CeVICA to engineer antibodies against  
21 the Receptor Binding Domain (RBD) of the SARS-CoV-2 spike proteins and identified >800  
22 predicted binder families. Among 14 experimentally-tested binders, 6 showed inhibition of  
23 pseudotyped virus infection. Antibody affinity maturation further increased binding affinity and  
24 potency of inhibition. Additionally, the unique capability of CeVICA for efficient and  
25 comprehensive binder prediction allowed retrospective validation of the fitness of our synthetic  
26 VHH library design and revealed direction for future refinement. CeVICA offers an integrated  
27 solution to rapid generation of divergent synthetic antibodies with tunable affinities *in vitro* and  
28 may serve as the basis for automated and highly parallel antibody generation.

29 Antibodies and their functional domains play key roles in research, diagnostics and therapeutics.  
30 Antibodies are traditionally made by immunizing animals with the desired target as antigen, but  
31 such methods are time consuming, their outcome is often unpredictable, and their use is  
32 increasingly restricted in the European Union <sup>1</sup>. Alternatively, antibodies can be generated and  
33 selected *in vitro*, where libraries of antibody-encoding DNA, either fully synthetic or derived from  
34 animals, are displayed *in vitro* followed by selection and recovery of those binding the intended  
35 target <sup>2,3</sup>. However, broad application of such *in vitro* methods remains a challenge, possibly due  
36 to throughput limitations and concerns over functional fitness and *in vivo* tolerance of antibodies  
37 generated *in vitro* <sup>4</sup>. Advances in antibody library design and construction, *in vitro* display and  
38 selection methods, post-selection binder identification and maturation will all help increase the  
39 utility of *in vitro* antibody generation <sup>2</sup>.

40 For typical antibodies, antigen binding is co-determined by the variable domains of both its heavy  
41 chain (VH) and light chain (VL/VK), but camelids produce unconventional heavy-chain-only  
42 antibodies that bind to antigens solely based on the variable domain of their heavy chain, the VHH  
43 domain (also known as nanobodies). VHHs are increasingly used as functional antibody domains  
44 because of their small size (~14 kD) <sup>5</sup> and high stability ( $T_m$  up to 90°C) <sup>6</sup>. VHH libraries have  
45 been successfully screened for binders by phage and yeast display <sup>7-9</sup>. However, the screen  
46 diversity of such cell-based systems is often limited by limited efficiency of DNA library delivery  
47 into cells (typically <10<sup>10</sup>). Conversely, cell-free approaches, such as ribosome display <sup>10</sup>, are not  
48 limited by transfection efficiency and cell culture constraints. Despite the advantage, ribosome  
49 display remains underutilized compared to cell-based display systems <sup>2</sup> and recent efforts to build  
50 *in vitro* system based on ribosome display alone produced inconsistent results <sup>11</sup>, suggesting that  
51 further optimization is required.

52 To leverage the advantages of cell-free display, we developed CeVICA (**C**ell-free **V**VHH  
53 **I**dentification using **C**lustering **A**nalysis) (**Fig. 1**), an integrated platform for *in vitro* VHH domain  
54 antibody engineering, distinct from previous systems<sup>11–13</sup>, that combines a novel design and  
55 generation method for CDR-randomized VHH libraries, optimized ribosome display and selection  
56 cycle with built-in background reduction, and a computational approach to perform global binder  
57 prediction from post-selection libraries. CeVICA first takes as input a linear DNA library, in which  
58 each sequence is unique and encodes for an artificial VHH with three fully-randomized CDRs, and  
59 where the 5' and 3' ends of the DNA molecules contain elements required for downstream *in vitro*  
60 ribosome display (**Fig. 1a, Materials and Methods**). Next, CeVICA uses ribosome display to link  
61 genotype (RNAs transcribed from DNA input library that are stop codon free, and stall ribosome  
62 at the end of the transcript) and phenotype (folded VHH protein tethered to ribosomes due to the  
63 lack of stop codon in the RNA) (**Fig. 1b, Materials and Methods**). In each selection cycle (**Fig.**  
64 **1c, Materials and Methods**), the displaying ribosomes bind to an immobilized target, followed  
65 by RT-PCR of the RNA attached to the bound ribosomes, which leads to double stranded cDNA,  
66 which is then *in vitro* transcribed/translated in a new round of ribosome display. The double  
67 stranded DNA in any chosen round is sequenced to obtain full-length VHH sequences (**Fig. 1d,**  
68 **Materials and Methods**). CeVICA then groups the sequences into clusters based on similarity of  
69 their CDR sequences, such that each cluster represents a unique binding family (**Fig. 1e, Materials**  
70 **and Methods**). Finally, one representative sequence from each cluster is synthesized and  
71 characterized for specific downstream applications (**Fig. 1f, Materials and Methods**). The  
72 combination of linear DNA libraries (**Fig. 1a**), ribosome display (**Fig. 1b**) and selection cycles  
73 (**Fig. 1c**) allow display of libraries with much larger diversity ( $>10^{10}$ ) than methods depending on  
74 cells<sup>14</sup> at similar experimental scale. As selection increases the representation of sequences

75 encoding binders, each binder sequence leads to a cluster of sequences in the output library.  
76 Clustering following high throughput sequencing identifies them more efficiently than methods  
77 that rely on the analysis of individual colonies or sequences<sup>7,8</sup>, promising a more comprehensive  
78 view of the landscape of binder potential, with minimal time and resources.

79 We made VHH libraries containing highly random CDRs, based on analysis of natural VHH  
80 sequences and using a three-stage PCR and ligation process (**Fig. 1g**). First, to guide our VHH  
81 library sequence design, we analyzed the sequence characteristics of 298 unique camelid VHHs  
82 (representing natural VHHs) from the Protein Data Bank (PDB) (**table S1**), highlighting three  
83 CDR regions, CDR1-3<sup>5</sup>, separated by four regions of low diversity, frame1-4 (**Fig. S1a**). The four  
84 frames share high homology with human IGHV3-23 or IGHJ4 (**Fig. S2a,b**), and most of the  
85 remaining non-identical residues are present in other human IGHV genes (**Fig. S2c**). We used  
86 consensus sequences extracted from this profile to design VHH DNA templates encoding the four  
87 frames (**Fig. 1g**), and included additional frames to the final mixture of frame templates (**Materials**  
88 **and Methods**), based on well-characterized VHHs<sup>6,15</sup>. The mixture of VHH frames serves as a  
89 template in PCR reactions, where DNA oligonucleotides with a 5' NNB sequence were used to  
90 introduce randomization in CDRs, while hairpin DNA oligonucleotides were used to block ligation  
91 of one end of the PCR product (**Fig. 1g** and **Fig. S3, Materials and Methods**). We introduced 7  
92 random amino acids for CDR1, 5 for CDR2, and 6, 9, 10 or 13 for CDR3 to match the most  
93 commonly observed CDR lengths in natural VHHs. CDR3s longer than 13 amino acids only  
94 account for a minority of natural VHHs (36%, **Fig. S1a, table S2**) and were not included in our  
95 VHH library. CDRs randomized in earlier stages are subject to duplication in later stages that  
96 reduces their diversity. We thus chose to randomize CDR2 first, followed by CDR1, and then  
97 CDR3, imposing a diversity hierarchy of CDR3>CDR1>CDR2, because this is the overall ranking

98 of diversity we observed in CDRs in natural VHHs (**Fig. S1a,c**). The sequence profile of the  
99 resulting randomized VHH library met our design objectives, and largely mirrored the sequence  
100 features of natural VHHs (**Fig. S1** and **table S2**). Finally, the VHH DNA library contains an  
101 upstream T7 promoter to allow transcription of VHH RNA, a 3xMyc tag, and a spacer downstream  
102 of the VHH coding region that stalls peptide release, to enable ribosome display (**Fig. 1h**).

103 To test the performance of our library in ribosome display, and to reduce unproductive sequences,  
104 such as VHHs that contain frame shifts or early stops, we ribosome displayed a library only with  
105 randomized CDR1 and CDR2 and performed one round of anti-Myc selection. Functional VHH  
106 sequences will express Myc tag at the C-terminal of VHH and are expected to be enriched after  
107 anti-Myc selection. Indeed, there was a large decrease of unproductive sequences and an increase  
108 of full-length VHHs (from 25.3% to 51.9%) after anti-Myc enrichment (**Fig. 1i**). At the DNA level,  
109 there was an increase of all in-frame CDR1 DNA lengths and decrease of frame-shift lengths (**Fig.**  
110 **1j**, arrows). We used the resulting full-length enriched CDR1 and 2 randomized library as PCR  
111 template for randomization of CDR3. The final library with all three CDRs randomized (hereafter,  
112 “the input library”) contained 27.5% full-length sequences, and  $3.68 \times 10^{11}$  full-length diversity per  
113  $\mu\text{g}$  of library DNA.

114 We performed *in vitro* selection from the input library for sequences that encode binders to two  
115 target proteins: EGFP and the receptor binding domain (RBD) of the spike protein of SARS-CoV-  
116 2<sup>16</sup> (**Fig. 2**). We fused each of the two proteins with a 3xFlag tag and immobilized them on beads  
117 coated with protein G and anti-Flag antibody (**Fig. 2a**). For each screen, we used input library  
118 DNA corresponding to  $\sim 1 \times 10^{11}$  full-length diversity, and performed 3 rounds of selection. After  
119 round 3, RNA yield markedly increased in both screens (**Fig. S4a**) and the recovered sequences  
120 were primarily composed of *E. coli* ribosomal RNAs and VHH library RNA (*e.g.*, **Fig. S4b**).

121 Comparing the input and output library sequences shows a marked increase in the proportion of  
122 stop-free VHH sequences after 3 rounds of selection (**Fig. 2c**), fitting our expectation that  
123 successful binding to targets depends on intact VHH structure.

124 We identified target specific binders by clustering CDR sequences enriched after selection into  
125 families. First, we examined the distribution of the sequence match scores (**Materials and**  
126 **Methods**) between randomly selected pairs of sequences within a CDR in a library, and compared  
127 these distributions for each CDR between the input and output libraries (**Fig. 2b, Materials and**  
128 **Methods**). In the pre-selection input libraries, the mean match score is low and the distribution is  
129 unimodal, as expected given the randomization; whereas after selection, there is a multi-modal  
130 distribution, with one low mode (similar to input) and at least one high mode (**Fig. 2b**), which is  
131 further distinguished when combining the CDR1 and CDR2 match scores (**Fig. 2b**). This high  
132 mode should reflect binders enriched by the selection rounds. Notably, sequences with a high  
133 match score in one CDR are more likely to have a higher match score in other CDRs (**Fig S4c-f**).  
134 We clustered the likely binder sequences exceeding a combined match score threshold (**Fig. 2b**,  
135 dashed horizontal line), yielding 862 unique clusters for RBD and 71 for EGFP, with 52 clusters  
136 shared by the two targets (**Fig. 2d, table S4 and 5**). The shared clusters likely target the shared  
137 components (protein G, anti-Flag antibody) present on the solid support surfaces, and thus  
138 represent background binders. Notably, RBD unique clusters span a wide range of cluster sizes  
139 (**Fig. 2e**).

140 Focusing on RBD binders, we chose one representative VHH gene from each of the 14 top-ranking  
141 RBD unique clusters and validated it for spike RBD binding and SARS-CoV-2 pseudovirus  
142 neutralization (**Fig. 2f-h, Materials and Methods**). RBD binding ELISA assays of the 14 tested  
143 VHHs (SR1-14) showed 3 strong binders (SR1,2,12), 7 weak binders (SR4,6,7,8,11,13,14) and 4

144 non-binders (**Fig. 2f,g**). SARS-CoV-2 S pseudotyped lentivirus neutralization assays revealed 6  
145 VHHs inhibiting infection above 30% at 1  $\mu$ M (**Fig. 2h**), which included the 3 strong binders and  
146 three of the weak binders (SR4,6,8).

147 We next compared input, output and natural CDR sequence distributions to assess whether starting  
148 with a fully random CDR amino acid profile may be generally detrimental to the fitness of binders,  
149 and whether selection mimics a natural amino acid distribution. In natural VHHs, CDR1 and  
150 CDR2 are less diverse than CDR3 with an amino acid profile that favors certain residues (**Fig.**  
151 **S1a,c**). Previous synthetic VHH library designs sought to recapitulate the CDR1 and CDR2 amino  
152 acid preferences of natural VHHs<sup>8,11,13</sup>, whereas we used fully-randomized NNB codons to encode  
153 all CDR positions. In principle, such a design might be less ideal if the natural CDR1 and CDR2  
154 amino acid profile is required for functional VHHs. To determine whether our fully random CDR  
155 amino acid profile is detrimental to the fitness of binders, we compared the CDR amino acid profile  
156 of 932 representative sequences across all unique clusters from both the EGFP and RBD output  
157 libraries (“output binders”) (**Fig. S5**) to the sequence profiles of either the input library or natural  
158 VHHs (**Fig. S1a,b**). We reasoned that if the amino acid profile in the input library leads to a  
159 distribution of proteins that are less fit in binding, the binder selection process should shift this  
160 distribution to a more fit profile in the output library, such that there is a low correlation between  
161 the amino acid profiles of the input library and output binders. Surprisingly, there was an overall  
162 smaller shift in CDR1 and CDR2 compared to CDR3, as indicated by higher  $r^2$  values (**Fig. S6a-**  
163 **c, mean  $r^2 = 0.45, 0.51, \text{ and } 0.36$  respectively), and lower similarity distances (as the RMSE  
164 relative to  $y = x$  line, **Materials and Methods, Fig. S6d,e, RMSE = 2.96, 2.40 and 3.51**  
165 respectively), implying that a fully random profile at CDR1 and CDR2 may not have had a  
166 substantial binding fitness cost at most positions, whereas CDR3 not only shifted away from the**



167 input profile, it was even further shifted from the natural profile (**Fig. S6d,e**). Moreover,  
168 correlation of amino acid profiles between output binders and natural VHHs are significantly less  
169 than between output binders and input library at most CDR positions (**Fig. S6**). A few positions  
170 (CDR1 position 7 and CDR3 position 1-3) had much lower input-output binders  $r^2$  than others.  
171 This suggests that these positions may benefit from specifically-designed amino acid profiles (to  
172 adjust off diagonal amino acids percentages (**Fig. S6b**) accordingly), even though their input  
173 distributions were not particularly distinct from the native sequence distribution compared to other  
174 positions (**Fig. S6a,d**). Thus, the output binder CDR profile is predominantly influenced by the  
175 input library rather than by selection towards a natural VHH profile, a natural VHH CDR amino  
176 acid profile is not required for VHH binding properties, and a fully random CDR design offers  
177 high diversity without a major binding fitness cost (although may have other fitness drawbacks *in*  
178 *vivo*).

179 To perform affinity maturation, a critical stage in antibody development in animals, we designed  
180 and performed an affinity maturation strategy based on CeVICA to increase the affinity of RBD  
181 binding VHHs (**Fig. 3a, Materials and Methods**). We used error-prone PCR to introduce random  
182 mutations across the full-length sequence of six selected VHHs (SR1,2,4,6,8,12) and generated the  
183 mutagenized library. A library size of  $4.18 \times 10^{10}$  diversity (sufficient to contain the full diversity  
184 of VHHs with three mutations per sequence) was used as input and three rounds of stringent  
185 selection were performed. We sequenced the libraries pre- and post-affinity maturation, and  
186 observed about 3 mutations in the pre-library and about 2 mutations in the post-library per  
187 sequence (**Fig. 3a**). We calculated their position-wise amino acid profiles, and determined, for  
188 each VHH, the change in each amino acid proportion at each position, generating a percent point  
189 change table. We defined putative beneficial mutations as those with a percent point increase above

190 a set threshold (**Fig. 3b, Materials and Methods** and **table S6**), highlighting between 8 to 25  
191 putative beneficial mutations for each of the selected VHHs. Finally, we assembled a list of  
192 identified putative beneficial mutations for each VHH and incorporated different combinations of  
193 them into each VHH parental sequence to generate multiple mutated variants of each VHH for  
194 final assessment (**table S7**).

195 Variants in the SR4 and SR6 families had both increased binding and neutralization, while the SR2  
196 and SR12 family variants had only increased neutralization but not binding, based on an ELISA  
197 binding assay and a pseudotyped virus neutralization assay (**Fig. 3c,d**). Multiple VHH variants  
198 outperformed VHH72, a previously described VHH antibody that neutralizes SARS-CoV-2  
199 pseudoviruses (Wrapp et al., 2020), in binding (*e.g.*, SR12\_c3), neutralization (*e.g.*, SR4\_t6), or  
200 both (*e.g.*, SR6\_c3) (**Fig. 3c,d** and **table S8**). Neutralization and binding performance were poorly  
201 correlated across variants ( $r^2 = 0.07$ ), as previously reported<sup>17</sup>. However, when considering each  
202 VHH family separately, trends were stronger, and neutralization and affinity were more highly  
203 correlated for SR4 and SR6 VHHs (**Fig. 3e**). This may be because variants within the same family  
204 share the same binding site and orientation. One intriguing hypothesis is that the slope of each  
205 VHH family's linear trend reflects the sensitivity of the virus to the blocking of the family's  
206 binding site. A dose response curve of selected VHHs showed SR6\_c3 as the most potent  
207 neutralizer (**Fig. 3f**) with an IC<sub>50</sub> of 62.7 nM (**Fig. 3g**), comparable to the Fab domains of potent  
208 SARS-CoV-2 neutralizing antibodies identified from human patients<sup>18</sup>. Importantly, the original  
209 SR6 cluster contained only 679 sequences, representing 0.67% of the 101,674 sequenced from the  
210 initial selection output, highlighting the power of CeVICA in rapidly identifying high performance  
211 antibodies among a vast number of potential candidates.

212 Finally, we examined the potential impact that our VHH sequences may have on immunogenicity  
213 in humans, as a major concern related to the therapeutic use of VHH antibodies is the possibility  
214 that, as camelid proteins, they would elicit an immune response. In particular, VHH hallmark  
215 residues in frame2 constitute a major difference between camelid VHHs and human VHs (**Fig.**  
216 **S2**). We used our affinity maturation data to identify potential conversion options for these VHH  
217 hallmark residues. In three of the four VHH hallmark residues there were VHHs where the residues  
218 were converted to the corresponding human residue as a result of affinity maturation (**Fig. S7**,  
219 arrows). These data imply that at least some of the VHH hallmark residues can be converted to  
220 human residues without loss of binding fitness. Such conversions may serve as frame features of  
221 future VHH library designs and improve tolerance of *in vitro* engineered VHHs by humans.  
222 Overall, the extension of CeVICA for affinity maturation offers a strategy for improving antibody  
223 function and additional iterations of the affinity maturation process may provide further  
224 enhancement of antibody properties.

225 In conclusion, CeVICA is a new system for synthetic VHH based antibody library design, *in vitro*  
226 selection optimization, post-selection screening, and affinity maturation. Using CeVICA, we  
227 generated a large collection of antibodies that can bind the RBD domain of the SARS-CoV-2 spike  
228 protein and can neutralize pseudotyped virus infection, thus providing an important resource.  
229 Given its seamlessly integrated procedure, CeVICA is amenable to automation and could provide  
230 an important tool for antibody generation in a rapid, reliable and scalable manner. CeVICA further  
231 provides a technology framework for incorporation of future refinements that could overcome  
232 limitations of *in vivo* fitness of *in vitro* generated antibodies and overall efficiency.

233

234

## 235 **Materials and Methods**

236

### 237 **Constructs**

238 DNA encoding VHHs were obtained by gene synthesis (IDT) and cloned into pET vector in frame  
239 with a C-terminal 6XHis tag by Gibson assembly (NEBuilder® HiFi DNA Assembly Master Mix,  
240 New England Biolabs). DNA encoding SARS-CoV-2 S RBD (S a.a. 319-541) were obtained by  
241 gene synthesis and cloned into pcDNA3 with an N-terminal SARS-CoV-2 S signal peptide (S a.a.  
242 1-16) and a C-terminal 3xFlag tag by Gibson assembly. EGFP was cloned into pcDNA3 with a C-  
243 terminal 3xFlag tag by Gibson assembly. SARS-CoV-2 S was amplified by PCR (Q5 High-  
244 Fidelity 2X Master Mix, New England Biolabs) from pUC57-nCoV-S (kind gift from Jonathan  
245 Abraham lab). SARS-CoV-2 S was deleted of the 27 a.a. at the C-terminal and fused to the  
246 NRVRQGYS sequence of HIV-1, a strategy previously described for retroviruses pseudotyped  
247 with SARS-CoV S<sup>19</sup>. Truncated SARS-CoV-2 S fused to gp41 was cloned into pCMV by Gibson  
248 assembly to obtain pCMV-SARS2ΔC-gp41. psPAX2 and pCMV-VSV-G were previously  
249 described<sup>20</sup>. pTRIP-SFFV-EGFP-NLS was previously described<sup>21</sup> (a gift from Nicolas Manel;  
250 Addgene plasmid # 86677; <http://n2t.net/addgene:86677> ; RRID:Addgene\_86677). cDNA for  
251 human TMPRSS2 and Hygromycin resistance gene was obtained by synthesis (IDT). pTRIP-  
252 SFFV-Hygro-2A-TMPRSS2 was obtained by Gibson assembly.

253

### 254 **Cell culture**

255 HEK293T cells were cultured in DMEM, 10% FBS (ThermoFisher Scientific), PenStrep  
256 (ThermoFisher Scientific). HEK293T ACE2 were a kind gift of Michael Farzan. HEK293T ACE2  
257 cells were transduced with pTRIP-SFFV-Hygro-TMPRSS2 to obtain HEK293T ACE2/TMPRSS2

258 cells. The transduced cells were selected with 320 µg/ml of Hygromycin (Invivogen) and used as  
259 a target in SARS-CoV-2 S pseudotyped lentivirus neutralization assays. Transient transfection of  
260 HEK293T cells was performed using TransIT®-293 Transfection Reagent (Mirus Bio, MIR 2700).

261

## 262 **Amino acid profile construction and analysis of natural VHHs**

263 VHH protein sequences were downloaded from the Protein Data Bank (only entries deposited prior  
264 to Sep 2<sup>nd</sup>, 2020 were included; **table S1**). VHHs were separated into CDRs and frames (segments)  
265 by finding regions of continuous sequence in each VHH that best matched to the following  
266 standard frame sequences:

267 frame1 standard: EVQLVESGGGLVQAGDSLRLSCTASG,

268 frame2 standard: MGWFRQAPGKEREVVAIS,

269 frame3 standard: AFYADSVRGRFSISADSAKNTVYLQMNSLKPEDTAVYYCAA,

270 frame4 standard: DYWGQGTQVTVSS,

271 Each matched region is the corresponding frame of the VHH, the region between frame1 and  
272 frame2 is CDR1, the region between frame2 and frame3 is CDR2, the region between frame3 and  
273 frame4 is CDR3 (**Fig. 1g**). Only VHH sequences with at least one unique CDR were selected to  
274 represent natural VHHs and used for constructing amino acid profile (a.a. profile). 298 sequences  
275 fit this selection criteria (**table S1**). The amino acid (a.a.) profile at each position within each  
276 segment was calculated by finding the percentage of each of the 20 universal proteinogenic amino  
277 acid at that position among all selected VHHs, all frame lengths were set to the same length as  
278 frame standards. CDR lengths were manually set to accommodate different CDR lengths, CDR1  
279 and CDR2 lengths was set to 10, CDR3 length was set to 30. VHHs with CDR lengths shorter than  
280 the corresponding set length had their CDR filled from the C-terminal end with empty position

281 holders up to the set length. Numbers in amino acid profile table are the percentage of each amino  
282 acid.

283

#### 284 **VHH library construction**

285 VHH libraries were constructed by ligation of PCR products in three stages, with each stage  
286 randomizing one of the three CDRs. Primers used and PCR cycling conditions for each primer pair  
287 are listed in **table S3**. At each stage, PCR was performed using a high-fidelity DNA polymerase  
288 without strand displacement activity, using Phusion DNA polymerase (New England Biolabs,  
289 M0530L). Importantly, 65°C was used as the elongation temperature to avoid hairpin opening  
290 during DNA elongation. PCR products with correct size were purified by DNA agarose gel  
291 extraction. Ligation and phosphorylation of PCR products were performed simultaneously using  
292 T4 DNA ligase (New England Biolabs, M0202L) and T4 Polynucleotide Kinase (New England  
293 Biolabs, M0201L). Ligation products with the correct size were purified by DNA agarose gel  
294 extraction using NucleoSpin Gel and PCR Clean-Up Kit (Takara, 740609.250, this kit was used  
295 for all DNA agarose gel extraction steps in this study). Purified ligation products were quantified  
296 with Qubit 1X dsDNA HS Assay Kit (ThermoFisher Scientific, Q33230, this kit was used for all  
297 Qubit measurements in this study) using Qubit 3 Fluorometer.

298

299 CDR2 was randomized in stage one, PCR templates at this stage were equal molar mixtures of  
300 plasmids carrying DNA encoding frames, including three frame1 versions, one frame2, three  
301 frame3 versions and one frame4. The three versions of frame1 and frame3 were derived from  
302 consensus sequence extracted from natural VHH a.a. profile, the A3 VHH<sup>6</sup> and a GFP binding  
303 VHH<sup>15</sup>. Amino acid sequences of the frames are shown in **fig. S1**.

304  
305 CDR1 was randomized in stage two, 200 ng of ligation product from the first stage were digested  
306 by Not I-HF (New England Biolabs, R3189S) and heat denatured, the entire digestion product was  
307 used as template for PCR in stage two. Ligation product of stage two was subject to one round of  
308 ribosome display and anti-Myc selection (below), the entire recovered RNA was reverse  
309 transcribed and PCR amplified and purified.

310  
311 270 ng of this RT-PCR product was used as template for PCR in stage three to randomize CDR3.  
312 Ligation product of stage three was purified by DNA agarose gel extraction. The purified ligation  
313 product was then digested by DraI (New England Biolabs, R0129S) and a fragment of ~680 bp in  
314 size was purified by DNA agarose gel extraction to get the final VHH library, referred to as the  
315 input library.

316  
317 **High throughput full-length sequencing of VHH library**  
318 Sequencing libraries from VHH DNA libraries were prepared by two PCR steps using primers and  
319 PCR cycling conditions listed in **table S3**. Equal mixtures of Phusion DNA polymerase (New  
320 England Biolabs, M0530L) and Deep Vent DNA polymerase (New England Biolabs, M0258L)  
321 were used for both PCRs to ensure efficient amplification. PCR cycle number was chosen to avoid  
322 over-amplification and typically falls between 5 to 15.

323  
324 In the first PCR, Illumina universal library amplification primer binding sequence and a stretch of  
325 variable lengths of random nucleotides were introduced to the 5' end of library DNA. And  
326 similarly, Illumina universal library amplification primer binding sequence and a stretch of

327 variable lengths of index sequence are introduced to the 3' end of library DNA. Eight different  
328 lengths were used for both random nucleotides and index to create staggered VHH sequences in  
329 the sequencing library, this arrangement is required for high quality sequencing of single amplicon  
330 libraries on an Illumina Miseq instrument. The product of the first PCR was purified by column  
331 clean-up using NucleoSpin Gel and PCR Clean-Up Kit and the entire sample was used as template  
332 for the second PCR.

333

334 In the second PCR, Illumina universal library amplification primers were used to generate  
335 sequencing library. Sequencing libraries were purified by DNA agarose gel extraction, quantified  
336 using Qubit 3 Fluorometer, and sequenced on an Illumina Miseq instrument using MiSeq Reagent  
337 Nano Kit v2 (500-cycles) (Illumina, MS-103-1003), no PhiX control library spike-in was used.  
338 Sequencing run setup was: paired end 2X258 with no index read. Index in the library was designed  
339 as inline index, so a separate index read was not required.

340

#### 341 **Ribosome display**

342 VHH DNA library containing a specified amount of diversity was first amplified using a DNA  
343 recovery primer pair listed in **table S3**. Equal mixtures of Phusion DNA polymerase (New England  
344 Biolabs, M0530L) and Deep Vent DNA polymerase (New England Biolabs, M0258L) were used  
345 for the PCR. PCR cycle number was chosen to avoid over-amplification and typically falls between  
346 5 and 15. In a standard preparation, 200-500 ng of the purified PCR product was used as DNA  
347 template in 25 µl of coupled *in vitro* transcription and translation reaction using PURExpress In  
348 Vitro Protein Synthesis Kit (New England Biolabs, E6800L). The reaction was incubated at 37°C  
349 for 30 minutes, then placed on ice, and 200 µl ice cold stop buffer (10 mM HEPES pH 7.4, 150



350 mM KCl, 2.5 mM MgCl<sub>2</sub>, 0.4 µg/µl BSA (New England Biolabs, B9000S), 0.4 U/µl SUPERase•In  
351 (ThermoFisher Scientific, AM2696), 0.05% TritonX-100) was then added to stop the reaction.  
352 This stopped ribosome display solution was used for binding to immobilized protein targets during  
353 *in vitro* selection. The amount of DNA template, volume of coupled *in vitro* transcription and  
354 translation reaction, and volume of stop buffer were scaled proportionally when different volumes  
355 of stopped ribosome display solution was needed. 1 to 8X standard preparations were used for  
356 each selection cycle.

357

### 358 ***In vitro* selection**

359 Target proteins were immobilized to magnetic beads by first coating protein G magnetic beads  
360 (ThermoFisher Scientific, 10004D) with anti-Flag antibody (Sigma-Aldrich, F1804), then  
361 incubating antibody-coated beads with cell lysate or cell media containing 3xFlag tagged target  
362 proteins at 4°C for 2 hours. For anti-Myc selection, magnetic beads were coated by anti-Myc  
363 antibody (ThermoFisher Scientific, 13-2500) only. The beads were washed three times with PBST  
364 (PBS, ThermoFisher Scientific, with 0.02% TritonX-100). Beads were then incubated with  
365 stopped ribosome display solution at 4°C for 1 hour, and then washed 4 times with wash buffer  
366 (10 mM HEPES pH 7.4, 150 mM KCl, 5 mM MgCl<sub>2</sub>, 0.4 µg/µl BSA (New England Biolabs,  
367 B9000S), 0.1U/µl SUPERase•In (ThermoFisher Scientific, AM2696), 0.05% TritonX-100). After  
368 washing, beads were resuspended in TRIzol Reagent (ThermoFisher Scientific, 15596026), and  
369 RNA was extracted from the beads, 25 µg of linear acrylamide (ThermoFisher Scientific,  
370 AM9520) were used as co-precipitant during RNA extraction. Reverse transcription of extracted  
371 RNA was performed using Maxima H Minus Reverse Transcriptase (ThermoFisher Scientific,  
372 EP0752). The reverse transcription reaction was purified using SPRIselect Reagent (Beckman

373 Coulter, B23317) to obtain purified cDNA. Purified cDNA was amplified by PCR using equal  
374 mixtures of Phusion DNA polymerase and Deep Vent DNA polymerase. PCR cycle number (**table**  
375 **S3**) was chosen to avoid over-amplification and typically falls between 10 to 25. The PCR product  
376 was purified by DNA agarose gel extraction. The purified PCR product was used for library  
377 generation for high throughput full-length sequencing or as DNA template for ribosome display  
378 reaction (coupled in vitro transcription and translation) to perform additional rounds of in vitro  
379 selection.

380

### 381 **CDR-directed clustering analysis**

382 Computational analysis for CDR-directed clustering was performed using custom python scripts.  
383 Paired end sequences were merged to form full-length VHH sequences. Merged VHH sequences  
384 were quality trimmed and translated into VHH protein sequence, which were separated into CDRs  
385 and frames (segments) as described in the *Amino Acid Profile Construction* section. Two VHHs  
386 were determined to have similar CDRs via the following steps. First, the ungapped sequence  
387 alignment score (match score) was calculated for each CDR of the two VHHs as the sum of  
388 BLOSUM62<sup>22</sup> amino acid pair scores at each aligned position. (If two CDRs have different  
389 lengths, their sequence alignment score was set to -5 by default.) The alignment scores of any two  
390 pairs of CDRs were summed to yield three scores, and if at least one of the three was larger than  
391 35 (**Fig. 2b**), the two VHHs were defined as having similar CDRs. Next, VHHs with similar CDRs  
392 were grouped by a two-step process. In the first step, we chose as VHH cluster-forming “seeds”  
393 those VHHs that were called as similar to at least 5 other VHHs (all remaining VHHs were not  
394 considered for clustering). In the second step, we iteratively selected a seed VHH with at least 5  
395 other similar (>35 match score) seed VHHs, and grouped all of them into one cluster, removing

396 them from the seed VHH pool, and iterated this procedure until no seed VHHs remained. For RBD,  
397 there were 83,433 seeds in the first step, and 83,392 were grouped in clusters in the second step.  
398 For EGFP, 71,210 of 71,220 seeds were grouped in clusters (**table S9**). This heuristic was fast in  
399 a standard computing environment with multiprocessing capabilities.

400

401 A representative sequence to illustrate each CDR in each cluster was chosen as the most frequent  
402 CDR sequence in the cluster (the chose representatives for CDR1,2, and 3 may not necessarily be  
403 from the same sequence, and are used only for illustrative purposes for each cluster as in **table S4**  
404 and **S5**; whole VHH sequences were used for gene synthesis and all downstream experiments). A  
405 consensus sequence was generated for each CDR, where each position in the CDR was represented  
406 by a 6 character string, such that the first and fourth character were the single letter code for the  
407 top and the second most abundant amino acid at the position, respectively, and the following two  
408 characters (second and third for the most abundant; fifth and sixth for the second most abundant),  
409 were their frequency, respectively (ranging from 00 for <34% to 99 for 100%). The consensus  
410 sequence for a CDR was recorded as a single “B00” when the standard deviation of the lengths of  
411 all CDRs was greater than 1. CDR scores were calculated by summing a score for each position in  
412 the CDR consensus sequence, with scores of 3, 2, 1 for positions where the most abundant amino  
413 acid had frequencies greater than 80%, 50%, or less, respectively, and a score of 0 for CDRs with  
414 a consensus sequence of a single “B00” (**table S4** and **table S5**). Representative whole VHH  
415 sequence for each cluster was selected as the one with the maximal sum of all CDR similarity  
416 score between each VHH and all other VHHs in the cluster.

417

418 **Protein expression and purification**

419 Target proteins used for *in vitro* selection and ELISA were prepared by transiently transfecting  
420 HEK293T cells with plasmids carrying either spike RBD with C-terminal 3xFlag tag and N-  
421 terminal signal peptide of spike (RBD-3xFlag), or EGFP with C-terminal 3xFlag tag (EGFP-  
422 3xFlag). Cell culture media (for RBD-3xFlag) or lysate of cell pellet (for EGFP-3xFlag) were used  
423 for coating magnetic beads or plates. VHHs with C-terminal 6XHis tag (VHH-6XHis) were  
424 purified by expressing in *E. coli.*, followed by purification using HisPur Cobalt Resin  
425 (ThermoFisher Scientific, 89964). Briefly, VHH-6xHis plasmids were transformed into T7  
426 Express *E. Coli.* (New England Biolabs, C2566I), single colonies were transferred into 10 ml LB  
427 media and grown at 37°C for 2-4 hours (until OD reached 0.5-1), the culture was chilled on ice,  
428 then IPTG was added to a final concentration of 10 µM. The culture was then incubated on an  
429 orbital shaker at room temperature (RT) for 16 hours. Bacterial cells were pelleted by  
430 centrifugation and lysed in B-PER Bacterial Protein Extraction Reagent (ThermoFisher Scientific,  
431 78248) supplemented with rLysozyme (Sigma-Aldrich, 71110), DNase I (New England Biolabs,  
432 M0303S), 2.5 mM MgCl<sub>2</sub> and 0.5 mM CaCl<sub>2</sub>. Bacterial lysates were cleared by centrifugation and  
433 mixed with wash buffer (50 mM Sodium Phosphate pH 7.4, 300 mM Sodium Chloride, 10 mM  
434 imidazole) at 1:1 ratio, and then incubated with 40 µl HisPur Cobalt Resin for 2 hours at 4°C. The  
435 resins were then washed 4 times with wash buffer. Proteins were eluted by incubating resin in  
436 elution buffer (50 mM Sodium Phosphate pH 7.4, 300 mM Sodium Chloride, 150 mM imidazole)  
437 at RT for 5 minutes. Purified protein samples were quantified by measuring absorbance at 280 nm  
438 on a NanoDrop Spectrophotometer.

439

440 **ELISA assay for VHH binding to RBD**

441 Maxisorp plates (BioLegend, 423501) were coated with 1µg/ml anti-Flag antibody (Sigma  
442 Aldrich, F1804) in coating buffer (BioLegend, 421701) at 4°C overnight. Plates were washed once  
443 with PBST (PBS, ThermoFisher Scientific, with 0.02% TritonX-100), a 1:1 mixture of HEK293T  
444 cell culture media containing secreted RBD-3xFlag and blocking buffer (PBST with 1% nonfat  
445 dry milk) was added to the plates and incubated at RT for 1 hour. RBD coated plates were then  
446 blocked with blocking buffer at RT for 1 hour. Plates were washed twice with wash buffer and  
447 purified VHHs-6xHis diluted in blocking buffer were added to the plates and incubated at RT for  
448 1 hour. Plates were washed three times with wash buffer, HRP conjugated anti-His tag secondary  
449 antibody (BioLegend, 652503) diluted 1:2000 in blocking buffer was then added to the plates and  
450 incubated at RT for 1 hour. Plates were washed three times with wash buffer and TMB substrate  
451 (BD, 555214) was added to the plate and incubate at RT for 10 to 20 minutes. Stop buffer (1N  
452 Sulfuric Acid) was added to the plates once enough color developed. Quantification of plates was  
453 performed by measuring absorbance at 450 nm on a BioTek synergy H1 microplate reader. Data  
454 reported were background subtracted. Two levels of background subtraction were performed: (1)  
455 subtracting absorbance measured from wells incubated with blocking buffer only (without purified  
456 VHHs-6xHis) from sample measurements (reflecting background absorbance by plates); and (2)  
457 subtracting absorbance from each VHH incubated wells coated only with anti-Flag antibody and  
458 without RBD (reflecting non-specific binding of each VHH).

459

#### 460 **Pseudotyped SARS-CoV-2 lentivirus production and lentivirus production for transductions**

461 Lentivirus production was performed as previously described <sup>20</sup>. Briefly, HEK293T cells were  
462 seeded at 0.8x10<sup>6</sup> cells per well in a 6 well plate and were transfected the same day with TransIT®-  
463 293 Transfection Reagent and a mix of DNA containing 1 µg psPAX, 1.6 µg pTRIP-SFFV-EGFP-

464 NLS and 0.4  $\mu\text{g}$  pCMV-SARS2 $\Delta$ C-gp41. Medium was changed after overnight transfection.  
465 SARS-CoV-2 S pseudotyped lentiviral particles were collected 30-34 hours post medium change  
466 and filtered on a 0.45 $\mu\text{m}$  syringe filter. To transduce HEK293T ACE2 the same protocol was  
467 followed, with a mix containing 1  $\mu\text{g}$  psPAX, 1.6  $\mu\text{g}$  pTRIP-SFFV-Hygro-2A-TMPRSS2 and 0.4  
468  $\mu\text{g}$  pCMV-VSV-G.

469

#### 470 **SARS-CoV-2 S pseudotyped lentivirus neutralization assay**

471 The day before the experiment,  $5 \times 10^3$  HEK293T ACE2/TMPRSS2 cells per well were seeded in  
472 96 well plates in 100  $\mu\text{l}$ . On the day of lentivirus harvest, SARS-CoV-2 S pseudotyped lentivirus  
473 was incubated with VHHs or VHH elution buffer in 96 well plates for 1 hour at RT (100  $\mu\text{l}$  virus  
474 + 50  $\mu\text{l}$  of VHH at appropriate dilutions). Medium was then removed from HEK293T  
475 ACE2/TMPRSS2 cells and replaced with 150  $\mu\text{l}$  of the VHH + pseudotyped lentivirus solution.  
476 Wells in the outermost rows of the 96 well plate were excluded from the assay. After overnight  
477 incubation, medium was changed to 100  $\mu\text{l}$  of fresh medium. Cells were harvested 40-44 hours  
478 post infection with TrypLE (Thermo Fisher), washed in medium, and fixed in FACS buffer  
479 containing 1% PFA (Electron Microscopy Sciences). Percentage GFP was quantified on a Cytotflex  
480 LX (Beckman Coulter) and data were analyzed with FlowJo.

481

#### 482 **Affinity maturation**

483 Error-prone PCR was used to introduce random mutations across the full length of selected VHH  
484 DNA sequences. 0.1 ng of plasmid carrying DNA sequence encoding each selected VHH were  
485 used as template in PCR reactions using Taq DNA polymerase with reaction buffer (10 mM Tris-  
486 HCl pH 8.3, 50 mM KCl, 7mM MgCl<sub>2</sub>, 0.5 mM MnCl<sub>2</sub>, 1 mM dCTP, 1 mM dTTP, 0.2 mM dATP,

487 0.2 mM dGTP) suitable for causing mutations in PCR products. Mutagenized library for input to  
488 CeVICA was made by ligating PCR products of error-prone PCR that carries VHH to DNA  
489 fragment containing the remaining elements required for ribosome display. Three rounds of  
490 ribosome display and *in vitro* selection were performed on the mutagenized library (pre-affinity  
491 maturation, after error-prone PCR) as described in the *In vitro selection* section, during which the  
492 incubation time of the binding step was kept between 5 seconds to 1 minute to impose a stringent  
493 selection condition, additional error-prone PCR was not performed during the selection cycles.  
494 The output library (post-affinity maturation) was sequenced along with the pre-affinity maturation  
495 library as described in the *High throughput full-length sequencing of VHH library* section.

496

#### 497 **Identification and ranking of beneficial mutations**

498 To identify potential beneficial mutations for each selected VHH we built an amino acid profile  
499 (a.a. profile) table for each VHH family in the pre- and post-affinity maturation library, and  
500 identified amino acids with increased frequency in the post-affinity maturation population  
501 compared to their pre-maturation frequency. For each VHH parental sequence, an a.a. profile was  
502 built of the percent of each a.a. across all VHH sequences originated from one parental VHH in  
503 the pre-affinity maturation library (“pre-a.a. profile”) and in the post-affinity maturation library  
504 (“post-a.a. profile”). A percent point change table was generated by subtracting the pre-a.a. profile  
505 from the post-a.a. profile, describing the change of frequency of each observed amino acid at each  
506 position of the VHH protein following affinity maturation.

507

508 We defined a putative beneficial mutation as either (1) the non-parental amino acid with the biggest  
509 increase in frequency if its increase is at least 0.5 percentage points; the score is the difference

510 from the parental amino acid frequency; or (2) the non-parental amino acid with the biggest  
511 increase after the parental amino acid if the increase is at least 1.5 percentage points; the score is  
512 the percent point change of the beneficial mutation. To avoid too many proximal putative  
513 beneficial mutations (which may cause structural incompatibility), a putative beneficial mutation  
514 was discarded if it (1) is outside the CDRs; (2) is less than 3 positions away from another beneficial  
515 mutation (“nearby mutation) and has a smaller beneficial mutation score than the nearby mutation;  
516 and (3) co-occurs less than twice with the nearby mutation. From this final list of putative  
517 beneficial mutations, different combinations were picked and incorporated into each VHH parental  
518 sequence that include one combination of all beneficial mutations in CDRs, one combination of  
519 the top-3 ranked (by beneficial mutation score) mutations in frames, and at least one combination  
520 of both CDR mutations and frame mutations (**table S7**).

521

522



523 **References and Notes:**

- 524 1. Gray, A. C. *et al.* Animal-derived-antibody generation faces strict reform in accordance  
525 with European Union policy on animal use. *Nat. Methods* **17**, 755–756 (2020).
- 526 2. Dübel, S., Stoevesandt, O., Taussig, M. J. & Hust, M. Generating recombinant antibodies  
527 to the complete human proteome. *Trends Biotechnol.* **28**, 333–339 (2010).
- 528 3. Miersch, S. & Sidhu, S. S. Synthetic antibodies: Concepts, potential and practical  
529 considerations. *Methods* **57**, 486–498 (2012).
- 530 4. Bradbury, A. R. M., Sidhu, S., Dübel, S. & McCafferty, J. Beyond natural antibodies: The  
531 power of in vitro display technologies. *Nat. Biotechnol.* **29**, 245–254 (2011).
- 532 5. Muyldermans, S. Nanobodies: Natural single-domain antibodies. *Annu. Rev. Biochem.* **82**,  
533 775–797 (2013).
- 534 6. Turner, K. B., Zabetakis, D., Goldman, E. R. & Anderson, G. P. Enhanced stabilization of  
535 a stable single domain antibody for SEB toxin by random mutagenesis and stringent  
536 selection. *Protein Eng. Des. Sel.* **27**, 89–95 (2014).
- 537 7. Huo, J. *et al.* Neutralizing nanobodies bind SARS-CoV-2 spike RBD and block  
538 interaction with ACE2. *Nat. Struct. Mol. Biol.* (2020). doi:10.1038/s41594-020-0469-6
- 539 8. McMahon, C. *et al.* Yeast surface display platform for rapid discovery of  
540 conformationally selective nanobodies. *Nat. Struct. Mol. Biol.* **25**, 289–296 (2018).
- 541 9. Boder, E. T. & Wittrup, K. D. Yeast surface display for screening combinatorial  
542 polypeptide libraries. *Nat. Biotechnol.* **15**, 553–557 (1997).
- 543 10. Hanes, J. & Plückthun, A. In vitro selection and evolution of functional proteins by using

- 544 ribosome display. *Proc. Natl. Acad. Sci. U. S. A.* **94**, 4937–4942 (1997).
- 545 11. Zimmermann, I. *et al.* Synthetic single domain antibodies for the conformational trapping  
546 of membrane proteins. *Elife* **7**, 1–32 (2018).
- 547 12. Hanes, J., Schaffitzel, C., Knappik, A. & Plückthun, A. Picomolar affinity antibodies from  
548 a fully synthetic naive library selected and evolved by ribosome display. *Nat. Biotechnol.*  
549 **18**, 1287–1292 (2000).
- 550 13. Moutel, S. *et al.* NaLi-H1: A universal synthetic library of humanized nanobodies  
551 providing highly functional antibodies and intrabodies. *Elife* **5**, 1–31 (2016).
- 552 14. He, M. & Taussig, M. J. Ribosome display: Cell-free protein display technology. *Briefings*  
553 *Funct. Genomics Proteomics* **1**, 204–212 (2002).
- 554 15. Kirchhofer, A. *et al.* Modulation of protein properties in living cells using nanobodies.  
555 *Nat. Struct. Mol. Biol.* **17**, 133–139 (2010).
- 556 16. Zhou, P. *et al.* A pneumonia outbreak associated with a new coronavirus of probable bat  
557 origin. *Nature* **579**, 270–273 (2020).
- 558 17. Rogers, T. F. *et al.* Isolation of potent SARS-CoV-2 neutralizing antibodies and protection  
559 from disease in a small animal model. *Science* **7520**, eabc7520 (2020).
- 560 18. Hansen, J. *et al.* Studies in humanized mice and convalescent humans yield a SARS-CoV-  
561 2 antibody cocktail. *Science* **0827**, eabd0827 (2020).
- 562 19. Moore, M. J. *et al.* Retroviruses Pseudotyped with the Severe Acute Respiratory  
563 Syndrome Coronavirus Spike Protein Efficiently Infect Cells Expressing Angiotensin-  
564 Converting Enzyme 2. *J. Virol.* **78**, 10628–10635 (2004).

- 565 20. Gentili, M. *et al.* Transmission of innate immune signaling by packaging of cGAMP in  
566 viral particles. *Science* **349**, 1232–1236 (2015).
- 567 21. Raab, M. *et al.* ESCRT III repairs nuclear envelope ruptures during cell migration to limit  
568 DNA damage and cell death. *Science* **352**, 359–362 (2016).
- 569 22. Henikoff, S. & Henikoff, J. G. Amino acid substitution matrices from protein blocks.  
570 *Proc. Natl. Acad. Sci. U. S. A.* **89**, 10915–10919 (1992).

571

572

573 **Acknowledgements.** We thank Christopher M Vockley for critical reading and editing of the  
574 manuscript, Matthew H Bakalar for helping with cloning VHH72, Leslie Gaffney and Anna  
575 Hupalowska for assistance in figure making, Michael Farzan for providing HEK293T expressing  
576 ACE2 and for discussing the SARS-CoV-2 S pseudotyped lentivirus neutralization approach,  
577 Jonathan Abraham for providing the pUC57-nCov19-S plasmid. Work was supported by the  
578 Klarman Cell Observatory and Klarman Incubator at the Broad Institute, NHGRI  
579 5RM1HG006193 (A.R.) and HHMI (A.R.). M.G. is the recipient of an EMBO Long-Term  
580 Fellowship (ALTF 486-2018) and a Cancer Research Institute/Bristol-Myers Squibb Fellow  
581 (CRI2993). Until July 31, 2020, A.R. was an Investigator of the Howard Hughes Medical Institute.

582

583 **Author contributions.** X.C. and A.R. conceived the study. X.C. designed and developed the  
584 CeVICA platform, performed selection and identification of EGFP and RBD binders, performed  
585 affinity maturation of RBD binders. M.G. developed and performed SARS-CoV-2 S pseudotyped  
586 lentiviruses neutralization assay. N.H. provided support for pseudotyped lentiviruses  
587 neutralization assay. X.C. and A.R. wrote the manuscript, with contributions from all co-authors.

588

589 **Competing interests.** A.R. is a founder and equity holder of Celsius Therapeutics, an equity  
590 holder in Immunitas Therapeutics and until August 31, 2020 was an SAB member of Syros  
591 Pharmaceuticals, Neogene Therapeutics, Asimov and ThermoFisher Scientific. From August 1,  
592 2020, A.R. is an employee of Genentech. N.H is an equity holder of BioNtech and is an advisor  
593 for Related Sciences. X.C. and A.R. are named co-inventors on a patent application related to  
594 CeVICA filed by the Broad Institute that is being made available in accordance with COVID-19  
595 technology licensing framework to maximize access to university innovations.

596

597 **Data and materials availability.** Antibody sequences are in **table S7** and will be made publicly  
598 available upon publication. Code for computational analysis will be available on Github. Key  
599 plasmids generated in this study will be deposited in Addgene.

600

Fig 1

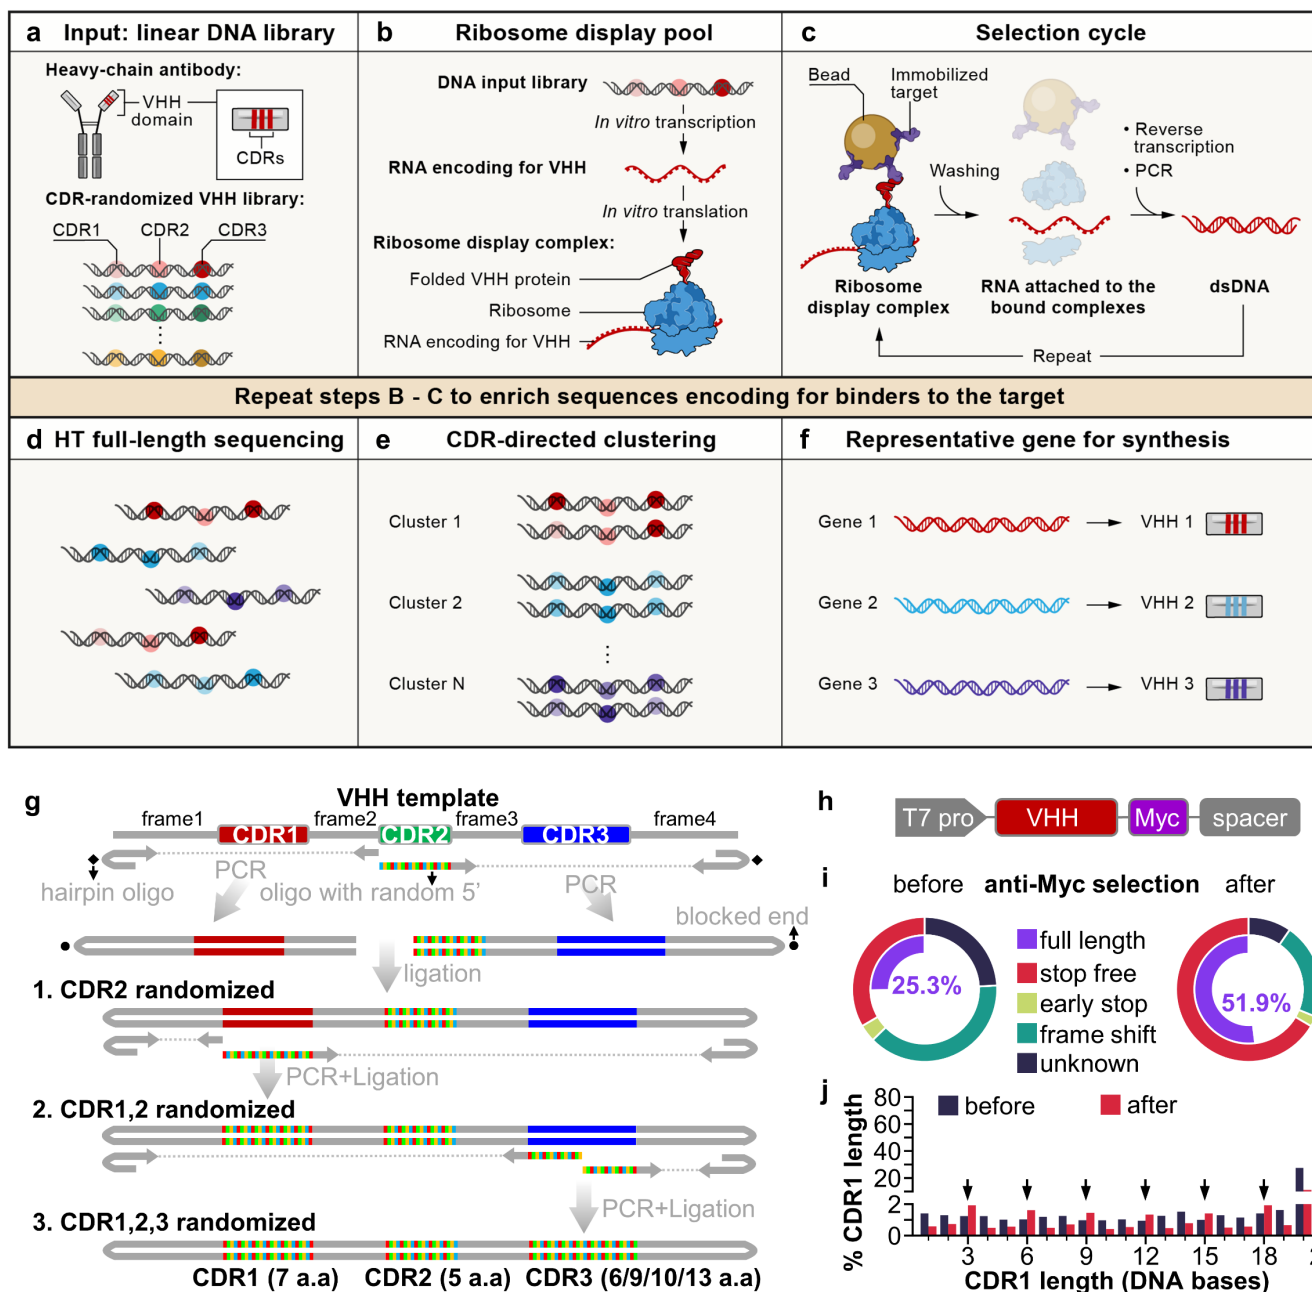

601 **Fig. 1. A cell-free antibody engineering platform for rapid isolation of antibodies from large**  
 602 **synthetic libraries.** (a) The workflow takes linear DNA library as input. (b) Ribosome display  
 603 links genotype (RNAs transcribed from DNA input library that are stop codon free, and stall  
 604 ribosome at the end of the transcript) and phenotype (folded VHH protein tethered to ribosomes  
 605 due to the lack of stop codon in the RNA). (c) Selection cycle that enriches DNA encoding for  
 606 VHHs that binds immobilized targets. (d) High throughput sequencing of full-length VHHs. (e)  
 607 Sequences are grouped into clusters based on similarity of their CDRs, each cluster is distinct and  
 608 represent a unique binding family. (f) The system outputs one representative sequence from each  
 609 cluster to be synthesized and characterized for specific downstream applications. (g) Workflow  
 610 for generating VHH library. VHH CDR randomization was introduced by PCR using a hairpin

611 oligo (blocks DNA end from ligation) and an oligo with random 5' sequence, followed by  
612 orientation-controlled ligation. Three successive PCR plus ligation cycles randomizes all three  
613 CDRs. **(h)** The final DNA library sequence structure. **(i)** One round of ribosome display and anti-  
614 Myc selection was performed after randomization of CDR1 and CDR2. The pie chart shows  
615 percentage of indicated sequence categories before and after anti-Myc selection. **(j)** Length  
616 distribution of DNA region encoding CDR1 of the VHH library before and after anti-Myc  
617 selection. Arrows indicate all correct-frame lengths showing increased percentage after anti-Myc  
618 selection.

619

620

Fig 2

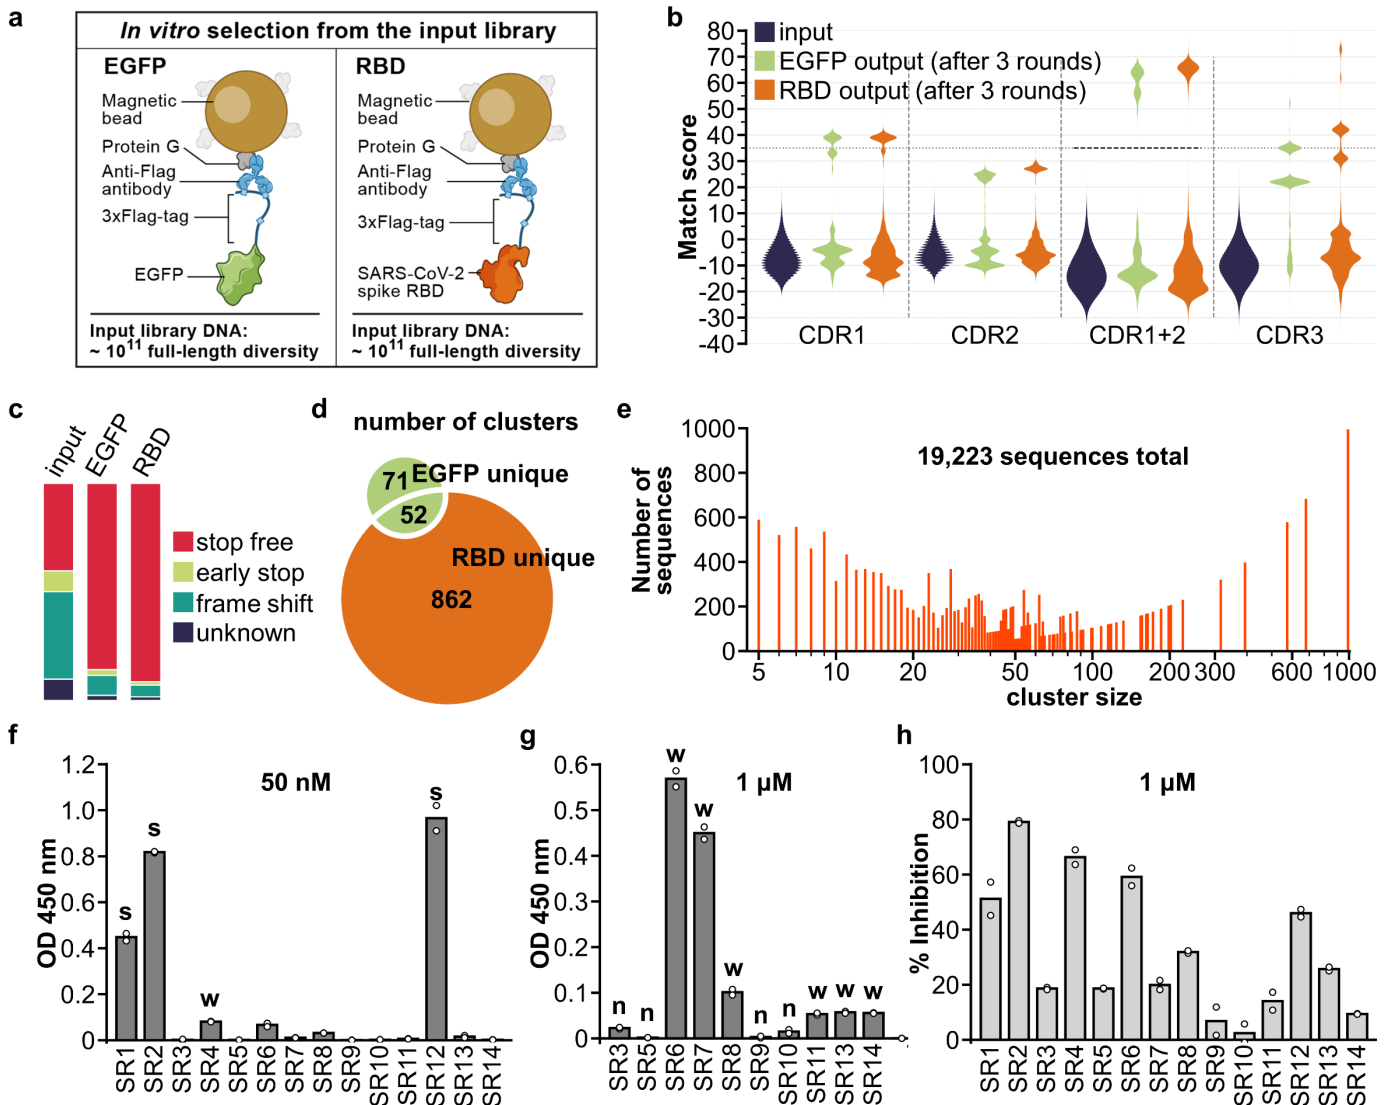

621 **Fig. 2. Isolation and characterization of synthetic VHhs that binds SARS-CoV-2 spike RBD.**  
 622 (a) Immobilization strategy for the target proteins: 3xFlag-tagged EGFP or RBD. (b) Pair-wise  
 623 CDR match score (based on BLOSUM62 matrix) were calculated for 2000 randomly selected  
 624 sequences from input library and output libraries after 3 rounds of selection. High match score  
 625 populations appeared in the output libraries. Combining CDR1 and 2 match scores further  
 626 separated high and low score population and a match score of 35 (black dashed line) was chosen  
 627 as cut-off for downstream clustering analysis. (c) Percentage of indicated sequence categories in  
 628 the input library and output libraries (EGFP, RBD). (d) Number of unique and shared clusters  
 629 identified in EGFP and RBD output libraries. (e) Number of sequences for each size of RBD  
 630 unique clusters. (f) ELISA assay revealed 3 strong binders (“s”) to RBD, 7 weak binders (“w”)  
 631 and (g) 4 non-binders (“n”) among the 14 VHhs chosen for characterization. (h) SARS-CoV-2 S  
 632 pseudotyped lentivirus neutralization assay showed 6 VHhs inhibiting infection >30% at 1  $\mu$ M on  
 633 HEK293T expressing ACE2 and TMPRSS2. Data shown are two technical replicates, bars indicate  
 634 the average of data, circles indicate values of each replicate.



Fig 3

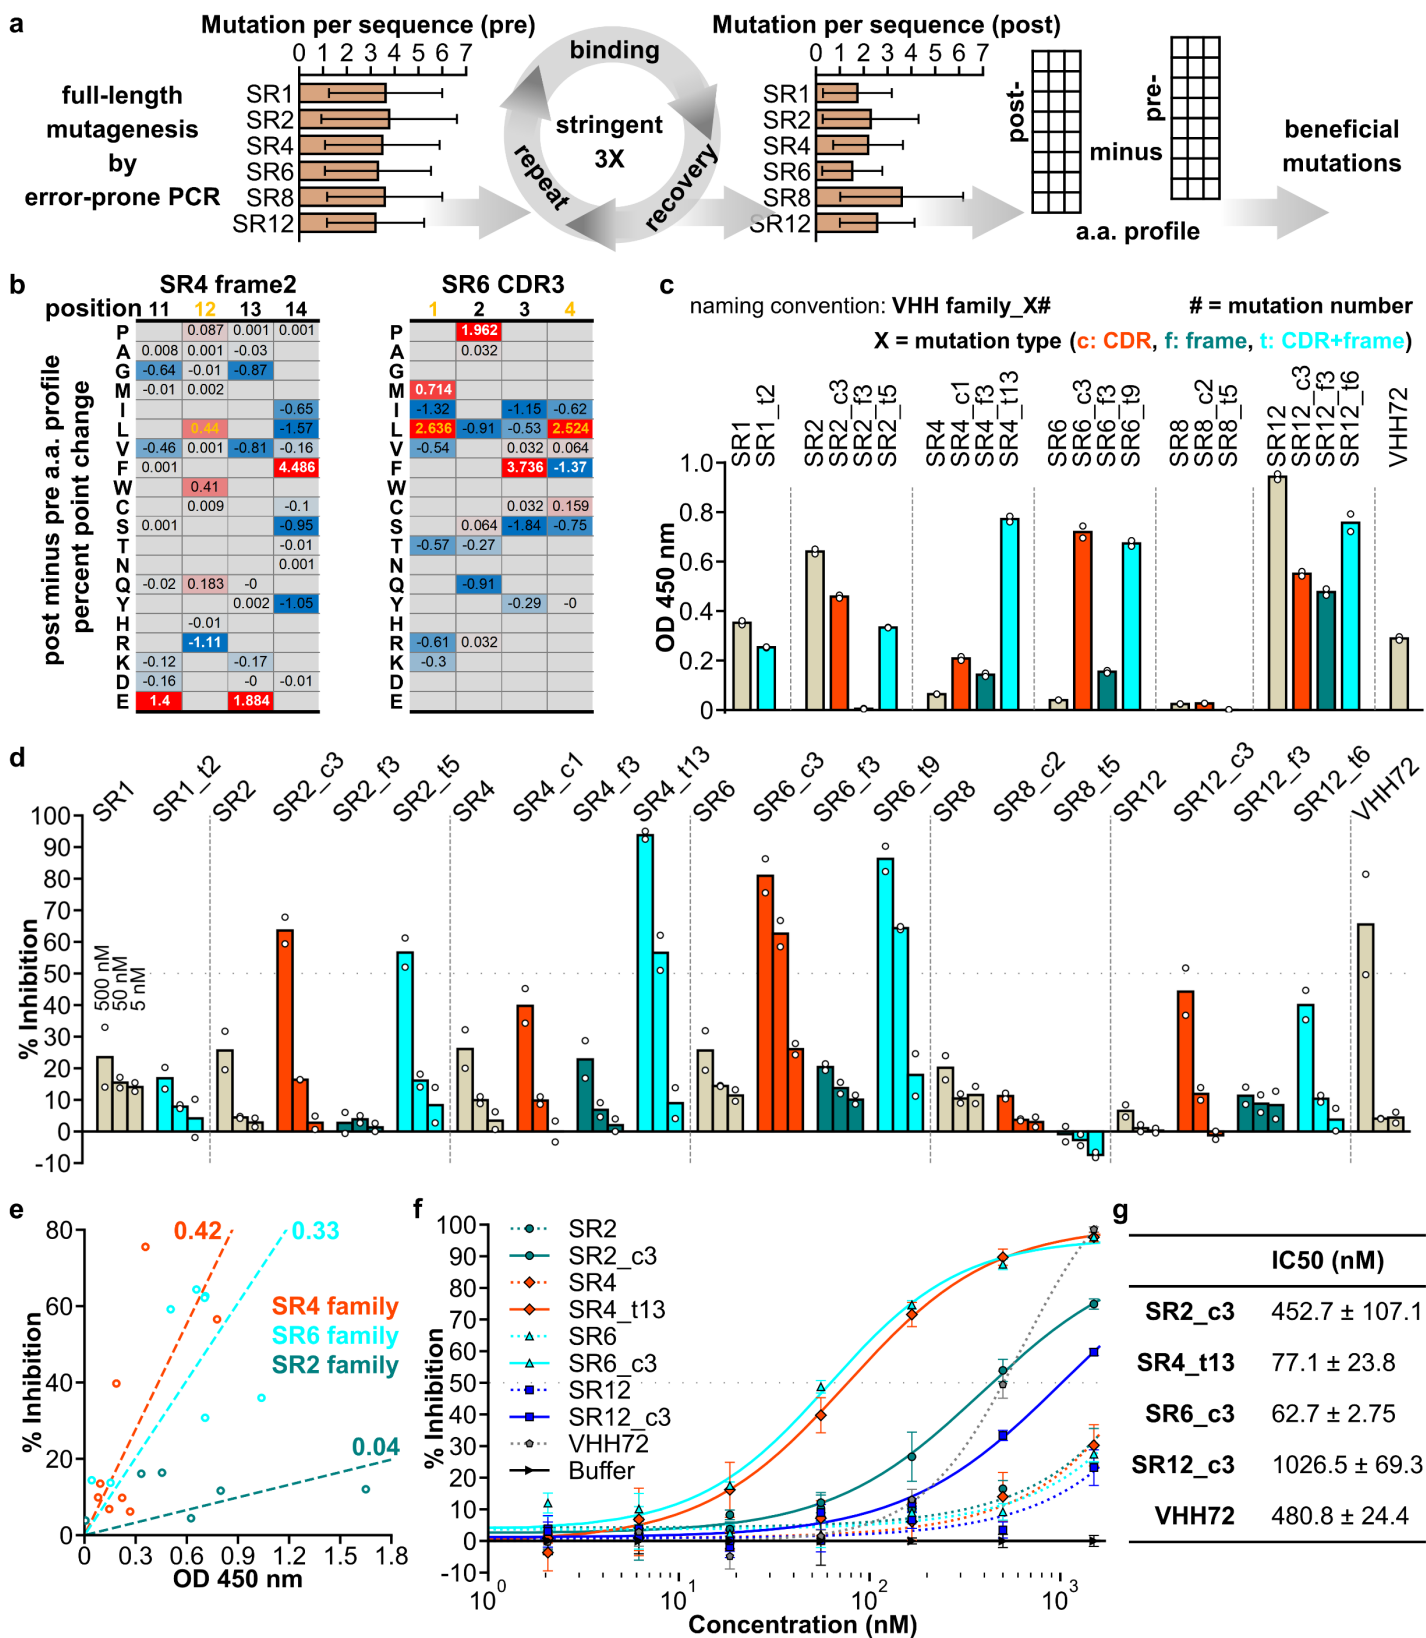

635 Fig. 3. An affinity maturation strategy enhances binding and neutralization properties of

636 **synthetic VHHs.** (a) Affinity maturation workflow. (b) Two representative sections of position-  
637 wise post- minus pre-affinity maturation amino acid percent point change profile. White values  
638 indicate the original amino acid, yellow values indicate the beneficial mutation. Empty positions  
639 indicate amino acids not detected in either the pre- or post- selection libraries. (c) ELISA assay of  
640 VHH variants. (d) SARS-CoV-2 S pseudotyped lentivirus neutralization assay of VHHs on  
641 HEK293T expressing ACE2 and TMPRSS2. For (c) and (d), data shown are two technical  
642 replicates, bars indicate the average of data, circles indicate values of each replicate. (e) Scatter  
643 plot of ELISA assay absorbance versus pseudotyped lentivirus neutralization as percent infection  
644 inhibited. VHH concentration for both assays were 50 nM. Values are average of two technical  
645 replicates. Numbers on linear fitting lines were  $r^2$  value for data within each family. (f) Dose-  
646 response curve for neutralization of pseudotyped lentiviral infection by VHHs. Markers are  
647 average of three technical replicates, error bars are standard deviation. (g) IC50 calculated from  
648 data in (f), presented as mean  $\pm$  standard deviation.

649

650

651

Fig S1

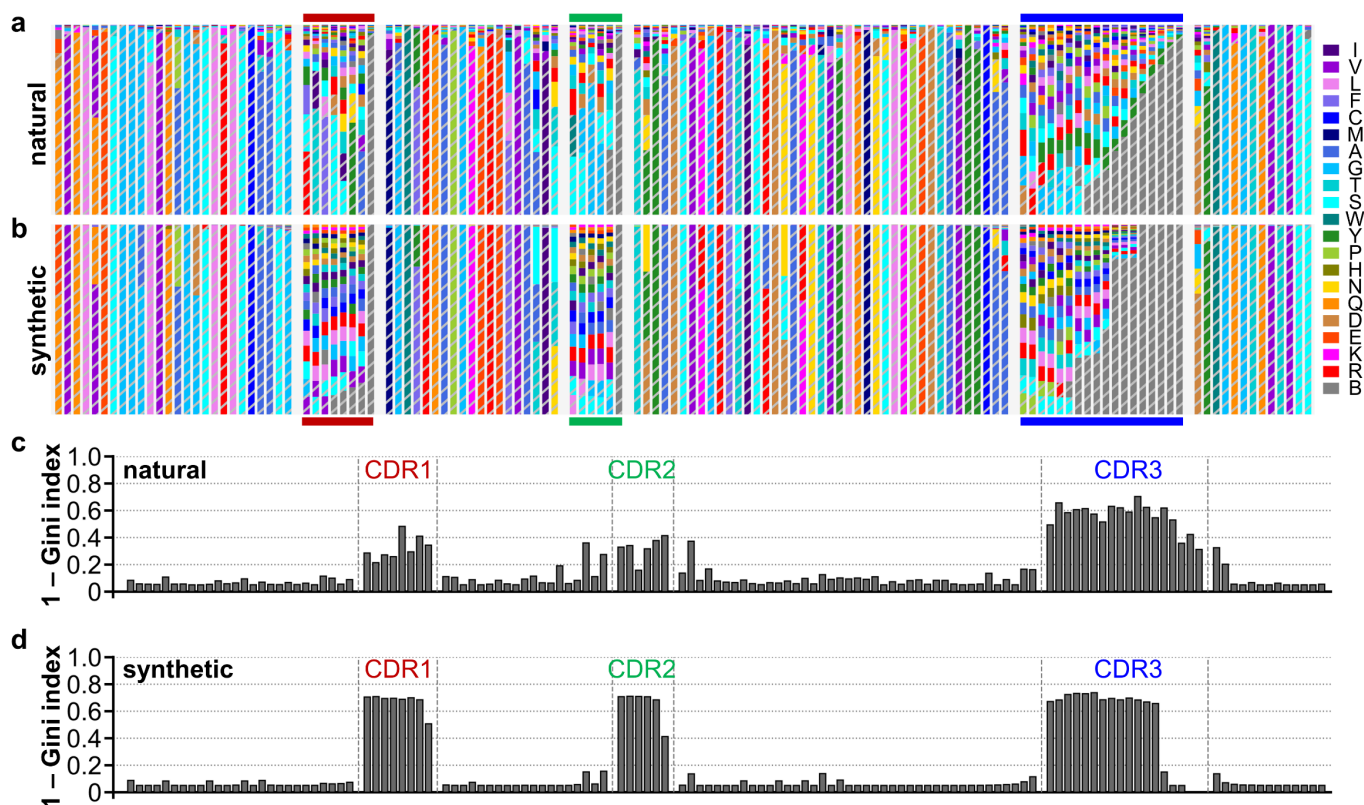

652 **Fig. S1. Amino acid profiles of natural and synthetic VHHs.** (a) Position-wise amino acid  
653 profile of natural VHHs (298 VHHs, PDB) and (b) synthetic VHHs. Amino acids were color  
654 coded according to labels to the right, B indicates an empty position. Bar height is the relative  
655 percentage of each amino acids. The two most common amino acids were shown as patterned  
656 bars while others were shown as solid bars. (c) Plot of diversity index (as 1 - Gini index) for  
657 each amino acid position of natural VHHs and (d) synthetic VHHs.

658

659

660

Fig S2

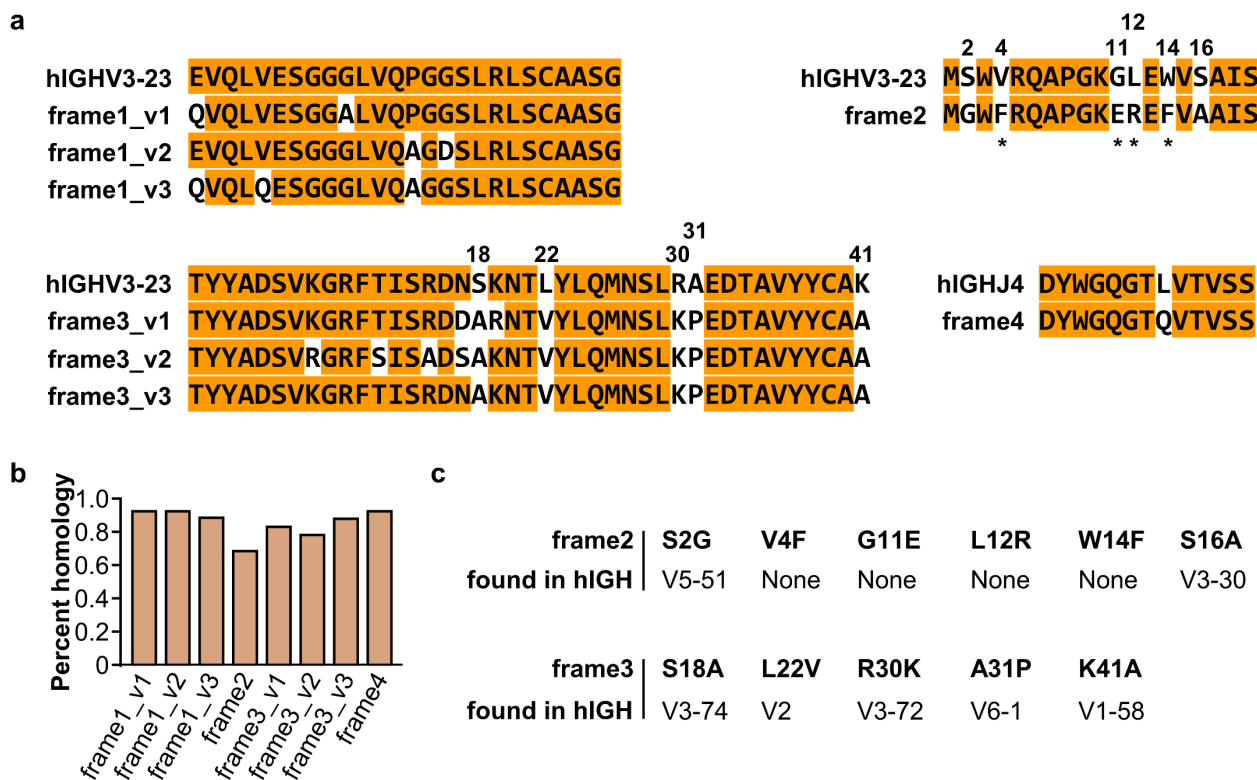

661 **Fig. S2. Design of VHH frames and their homology to human IGH genes.** (a) Amino acid  
 662 sequences encoded by frames that serve as templates for VHH library generation were aligned to  
 663 the corresponding segments of the human IGHV3-23 (hIGHV3-23) or IGHJ4 (hIGHJ4). Positions  
 664 in hIGHV3-23/hIGHJ4 that are identical to the corresponding position in at least one VHH frames  
 665 are highlighted in orange. Positions in VHH frames that are identical to the corresponding position  
 666 in hIGHV3-23/hIGHJ4 are highlighted in orange. hIGHV3-23 positions not identical to any VHH  
 667 frames are numbered according to its position within the segment. Asterisks indicate VHH  
 668 hallmark residues thought to be required for VHH's independence of light chain. (b) Percent  
 669 homology of VHH frames to the closest human gene. (c) List of VHH residues at positions  
 670 numbered in (a) and representative human IGHV genes that encode the same VHH residue at the  
 671 corresponding position. None: no human IGHV genes has the VHH residue at the corresponding  
 672 position.

673  
 674  
 675  
 676

Fig S3

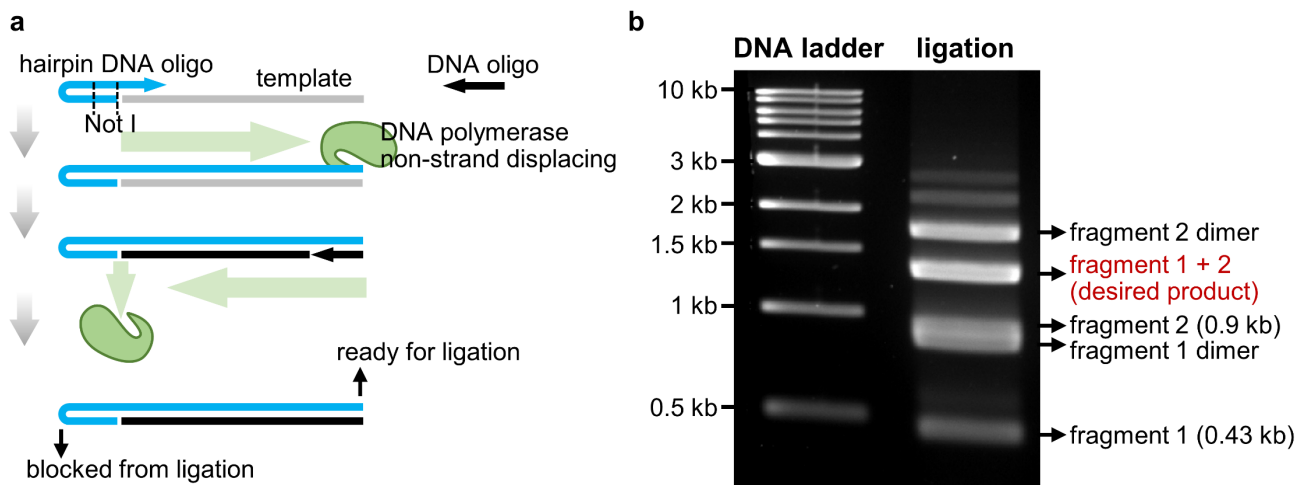

677 **Fig. S3. Working principles for orientation-controlled ligation by end blocking using**  
678 **hairpin oligos.** (a) working principle for generating one end blocked DNA for orientation-  
679 controlled ligation by PCR using a hairpin DNA oligo. (b) Representative orientation-controlled  
680 ligation products visualized by agarose gel electrophoresis.

681

682

683

Fig S4

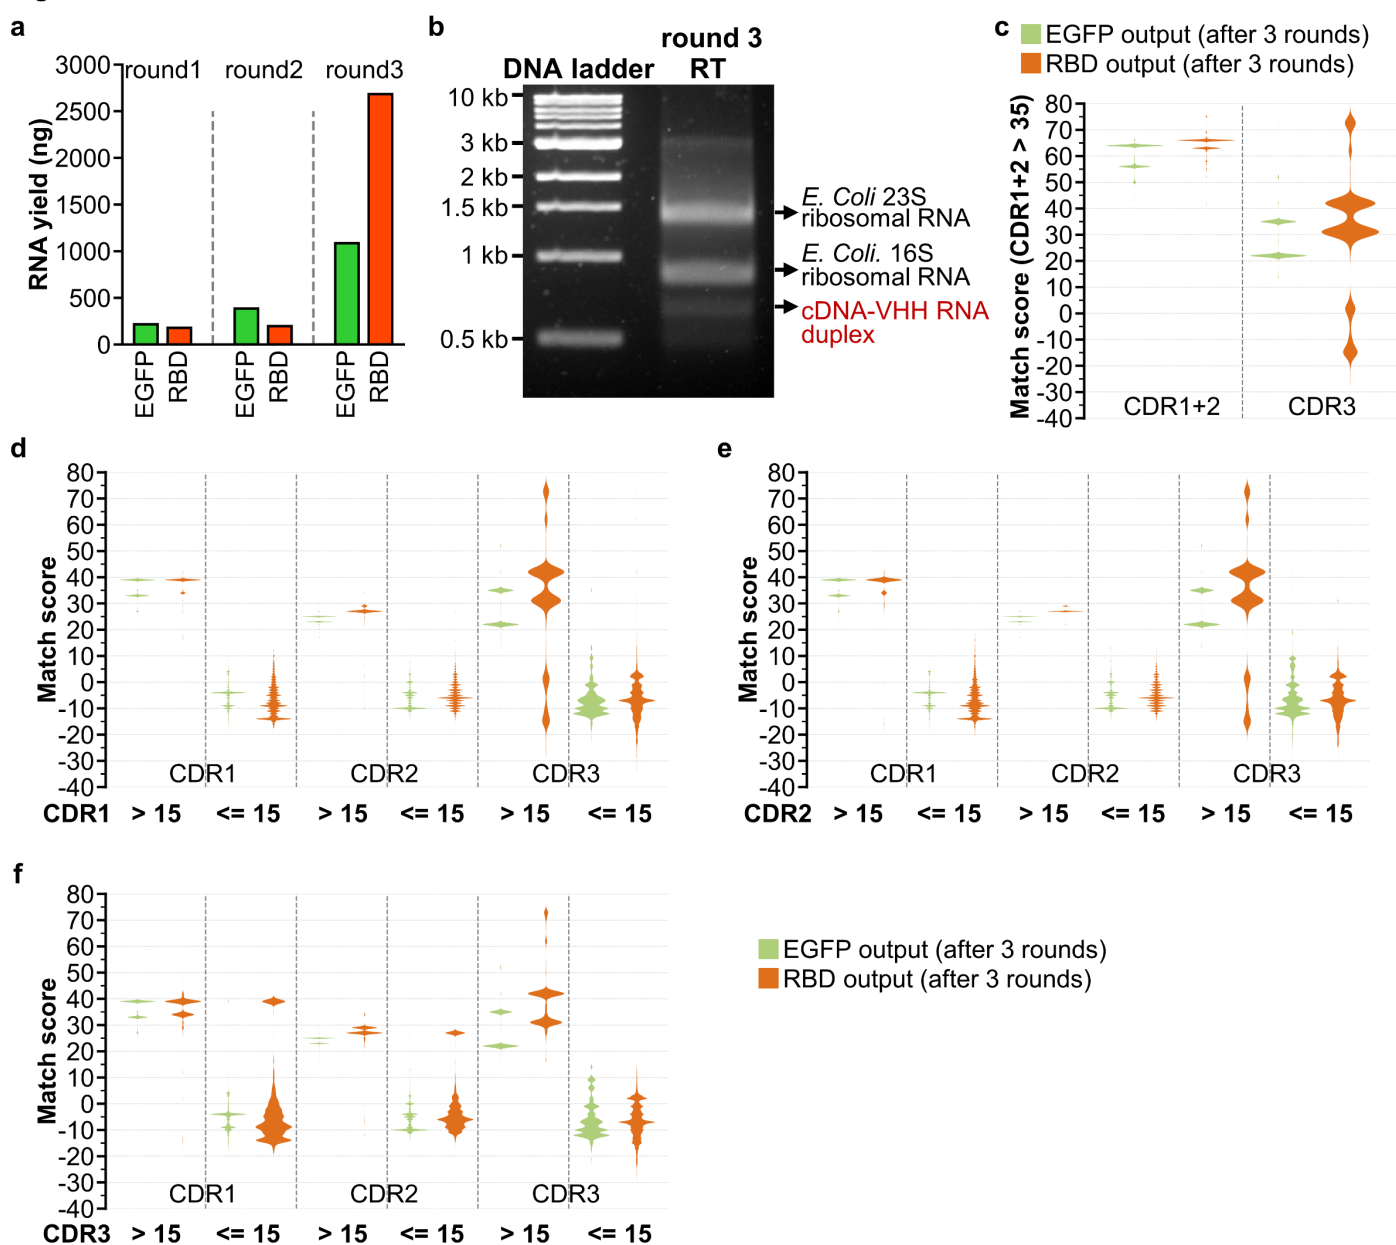

684 **Fig. S4. Evaluation of ribosome display and selection rounds.** (a) Yield of recovered RNA at  
 685 each round of ribosome display and selection for EGFP or RBD targets. (b) Representative RT  
 686 reaction (without heat denaturation) product for RBD selection after 3 rounds, visualized by  
 687 agarose gel electrophoresis. (c) Plot of match scores of sequence pairs with a combined CDR1  
 688 and CDR2 score > 35. (d) Plot of match scores of sequence pairs (from 2000 randomly sampled  
 689 sequences) with indicated CDR1 scores, and (e) indicated CDR2 scores, and (f) indicated CDR3  
 690 scores.

691

Fig S5

a

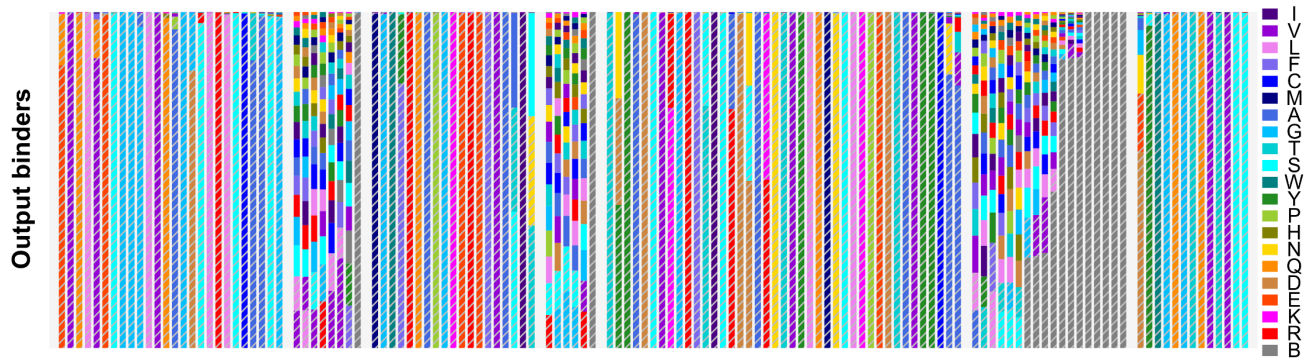

b

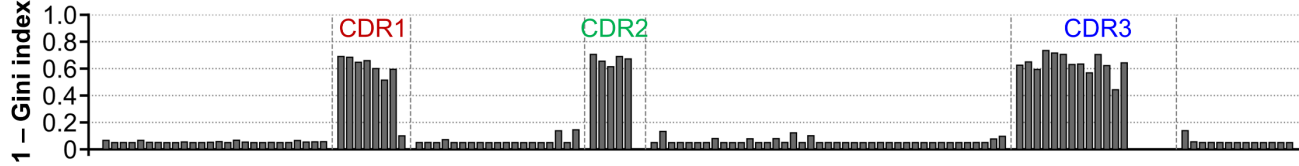

692 **Fig. S5. Amino acid profile for EGFP and RBD unique output binders.** (a) Amino acid  
693 profile of representative VHH sequence for each unique cluster identified from RBD and EGFP  
694 output libraries (“output binders”, 932 sequences). Plotted as described in **Fig S1a**. (b) Plot of  
695 diversity index (as 1 – Gini index) for each amino acid position of output binder VHHs.

696

697

698

Fig S6

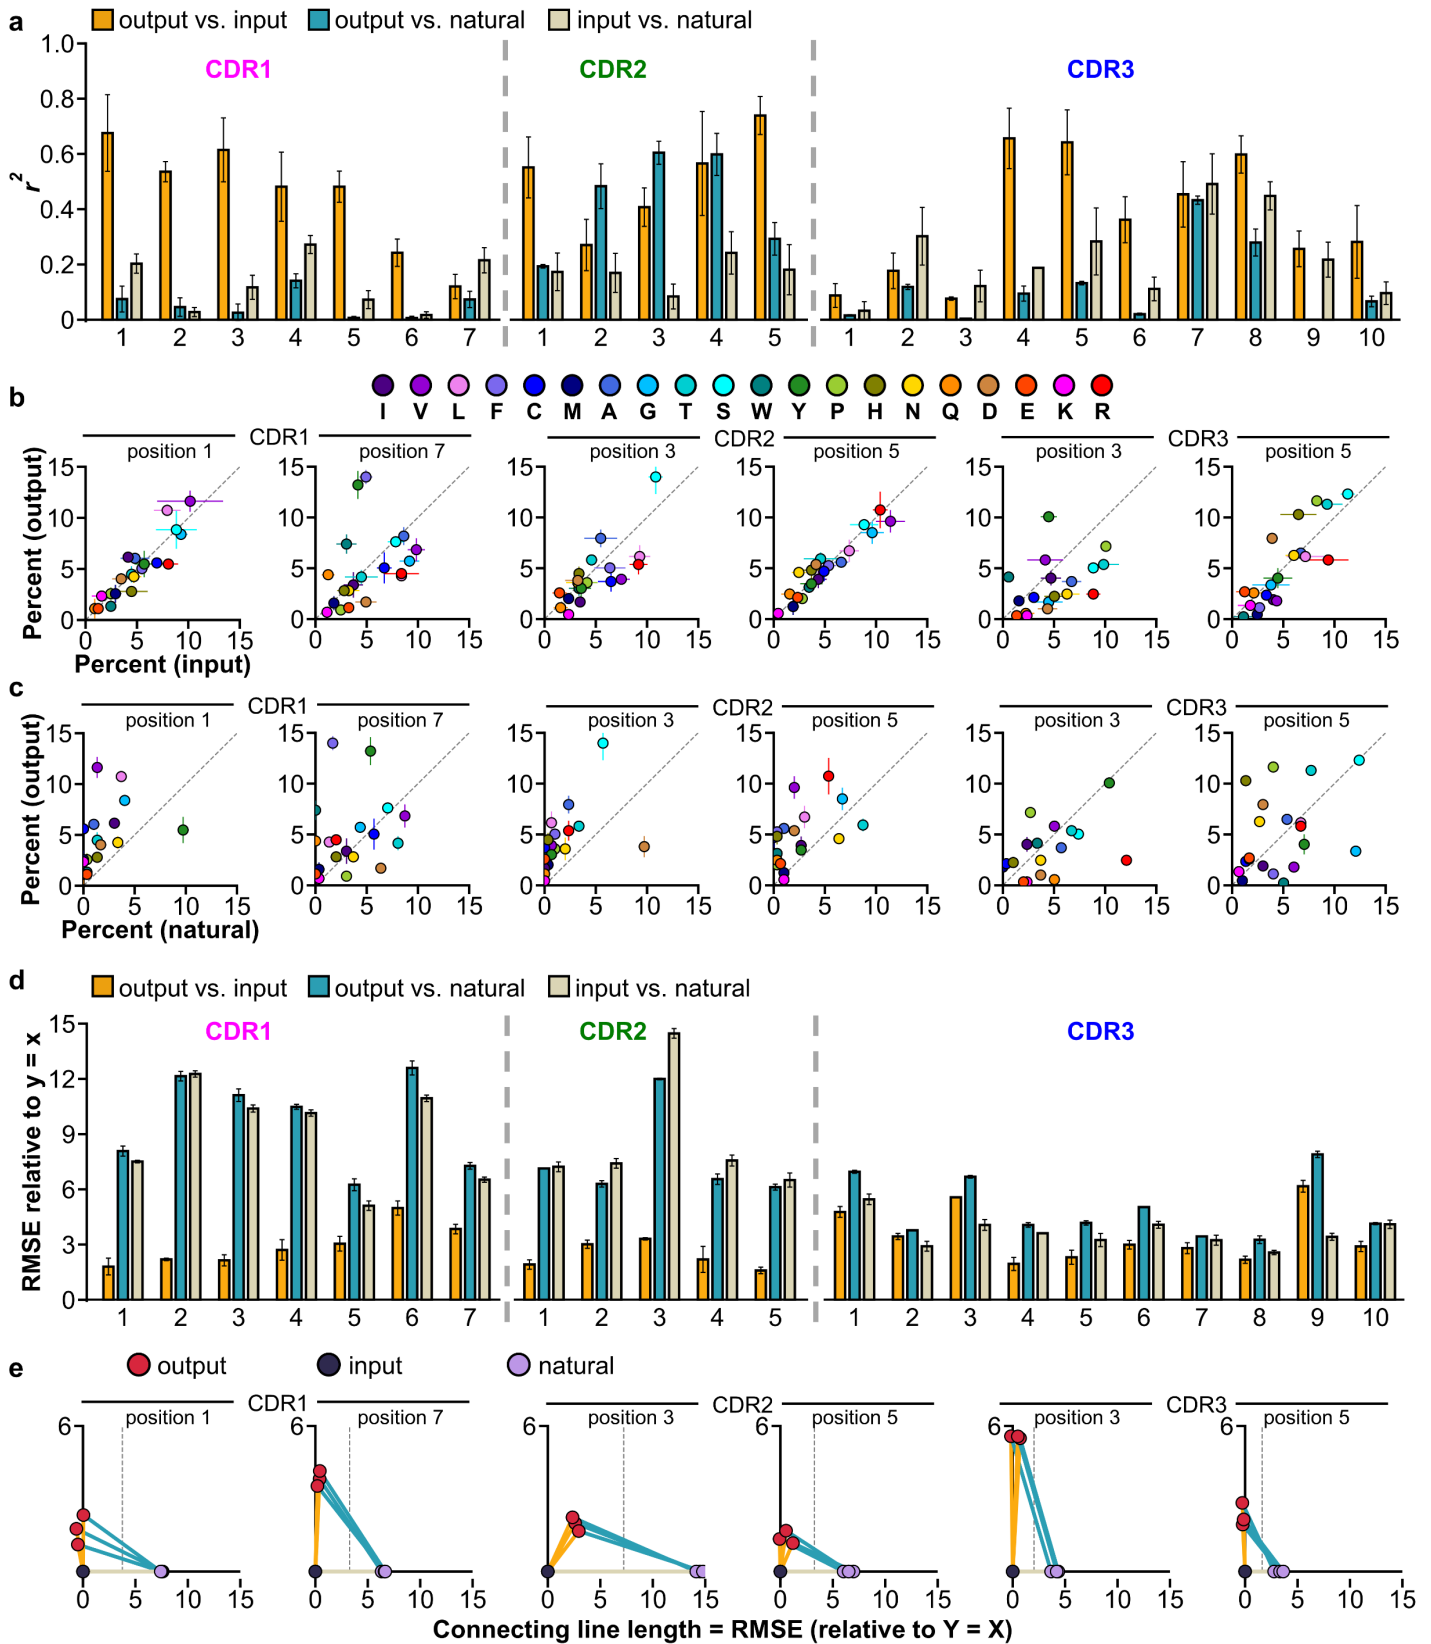

699 Fig. S6. Unique output binders amino acid profiles correlate more highly with that of input



700 **library than natural VHHs.** (a)  $r^2$  values for the amino acid percentages in the indicated  
701 sequence group pairs at each CDR position. 298 natural VHHs (natural) and 298 randomly  
702 sampled sequences from input library (input) and output binders (output) were analyzed. Three  
703 random sampling trials were performed to generate three  $r^2$  for each position. (b) Scatter plots of  
704 the percentage of each amino acid in the input library and the output binders and (c) that in the  
705 natural VHHs and the output binders at representative CDR positions. Circles are the mean and  
706 error bars are the standard deviation of data. (d) Root mean square error (RMSE, relative to  $Y =$   
707  $X$  line) values for the indicated sequence group pairs at each CDR position. Using the same  
708 randomly sampled sequences as (a). (e) Plot showing the similarity distances between the three  
709 sequence groups, with each connecting line length between two sequence groups indicating their  
710 RMSE. Vertical dashed lines indicate the middle point of the distance between output and  
711 natural sequence groups  
712

Fig S7

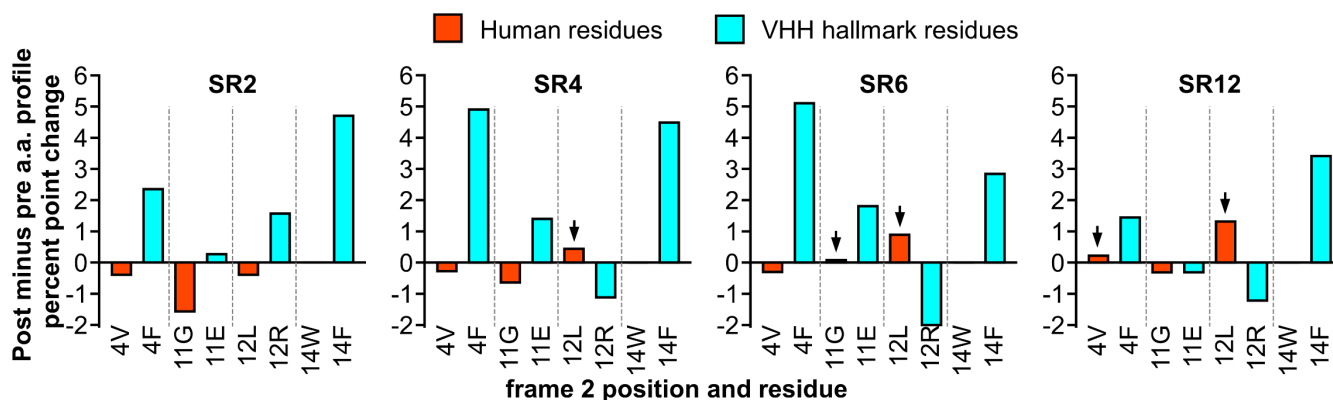

713 **Fig. S7. Affinity maturation leads to some VHH hallmark residues converting to the**  
 714 **corresponding human VH residues.** The post- minus pre-affinity maturation percent point  
 715 change of VHH hallmark residues and the corresponding human residues for each VHH. Arrows  
 716 indicate human residues with increased frequency as a result of affinity maturation.

717

718

719 **Table S1. Natural VHH sequences selected for calculating natural VHH amino acid profile.**  
 720 Amino acid sequences of all VHHs from Protein Data Bank (sheet: all\_VHH\_RSCB) and from  
 721 which 298 unique VHHs were selected to represent natural VHHs (sheet: unique\_VHH\_RSCB),  
 722 the sequences were separated into 4 frames and 3 CDRs.

723

724 **Table S2. Amino acid profile of natural VHHs and synthetic VHHs in the VHH input library.**  
 725 Position-wise amino acid profile of natural VHHs and VHHs in the input library. Positions are  
 726 relative positions within each segment and numbers are percentage of the corresponding amino  
 727 acid labelled to the left of each segment.

728

729 **Table S3. Primers and templates used for generation, selection and sequencing of VHH**  
 730 **library.** Primer sequences used in this study and VHH frame template sequences. PCR cycling  
 731 conditions were also shown.

732

733 **Table S4. List of RBD binder clusters.** A list containing key information for all predicted RBD  
 734 binding clusters (sheet: all clusters) and unique RBD binding clusters (sheet: all CDR unique).  
 735 Cluster ID, size, CDR representative sequences, CDR consensus sequences, CDR scores  
 736 (**Materials and Methods**), and whether each CDR is unique to RBD and not found in EGFP  
 737 clusters were shown.

738

739 **Table S5. List of EGFP binder clusters.** A list containing key information for all predicted  
 740 EGFP binding clusters (sheet: all clusters) and unique EGFP binding clusters (sheet: all CDR  
 741 unique). Cluster ID, size, CDR representative sequences, CDR consensus sequences, CDR scores  
 742 (**Materials and Methods**), and whether each CDR is unique to EGFP and not found in RBD  
 743 clusters were shown. The cluster with ID 0, is a spike-in VHH<sup>15</sup>, and did not originate from the  
 744 input library.

745  
746 **Table S6. Affinity maturation subtracted amino acid profile for SR4 and SR6.** Position-wise  
747 post- minus pre- affinity maturation amino acid profile for SR4 and SR6. Numbers are percent  
748 point change of each amino acid after affinity maturation.  
749  
750 **Table S7. Amino acid sequences of VHH variant and the mutations they contain.** Amino acid  
751 sequences of all VHH variants characterized in this study.  
752  
753 **Table S8. VHH variants ELISA and neutralization data.** ELISA binding assay and  
754 pseudotyped virus neutralization assay results for all VHH variants characterized in this study.  
755  
756 **Table S9. High-throughput sequencing and analysis metadata.** Number of sequences obtained  
757 by high-throughput sequencing for indicated analyses.  
758  
759 **Data S1. Cluster files for SR1, SR2, SR4, SR6, SR8, SR12.** Text file containing all sequences  
760 belonging to each cluster. Each line in the file represent one sequence, both segments and full  
761 length of the sequence were shown, shown items were divided by “#” and in the order from start  
762 to end of each line was: CDR1 amino acid sequence, CDR2 amino acid sequence, CDR3 amino  
763 acid sequence, full-length amino acid sequence, full-length DNA sequence.  
764
